# Supplementary material for: Genetic evolution of hemagglutinin and neuraminidase genes of H5N1 highly pathogenic avian influenza viruses in Thailand
Source: PeerJ. 2022 Nov 30;10:e14419. doi: 10.7717/peerj.14419 (PMC9744161; doi:10.7717/peerj.14419)
Supplement: Data S1 [file peerj-10-14419-s005.xlsx]

## Sheet: Raw data for Fig 1
HA nucleotide sequences of H5N1 viruses analyzed in Figure 1 of the present study
HA nucleotide sequences of H5 Clade reference strains
Clade	Accession Number	Strain
0	AF148678.1	A/goose/Guangdong/1/96
1.1.1	AB727935.1	A/duck/Vietnam/OIE-0062/2012
1.1.1	HQ200596.1	A/Cambodia/S1211394/2008
1.1.2	JN588804.1	A/Cambodia/U0417030/2010
1.1.2	JX021303.1	A/duck/Vietnam/ST0970/2009
1.1	CY029527.1	A/duck/Vietnam/1233/2005
1	AF036356.1	A/HongKong/156/97
1	AF084280.1	A/HongKong/483/97
1	AY651333.1	A/VietNam/1194/2004
1	EF456803.1	A/VietNam/HN30408/2005
1	EF541403.1	A/VietNam/1203/2004
1	HM114465.1	A/Vietnam/UT3030/2003
2.1.1	CY028963.1	A/duck/Hunan/795/2002
2.1.2	DQ497664.1	A/turkey/Kedaton/BPPV3/2004
2.1.3	GQ122395.1	A/chicken/CentralJava/UT3091/2005
2.2.1	DQ407519.1	A/turkey/Turkey/1/2005
2.2.1	EU719116.1	A/egret/Egypt/1162-NAMRU3/2006
2.2.2	CY043375.1	A/chicken/Bangladesh/394/2007
2.2	DQ659327.1	A/bar_headed_goose/Qinghai/1A/2005
2.2	EF205155.1	A/chicken/Omsk/14/05
2.3.1	HM172105.1	A/duck/Hunan/70/2004(H5N1
2.3.2	HM172116.1	A/duck/Guangdong/23/2004
2.3.3	DQ992755.1	A/chicken/Guiyang/3055/2005
2.3.4	DQ371928.1	A/Anhui/1/2005
2.4	DQ095624.2	A/Chicken/Yunnan/447/05
2.4	DQ366338.1	A/duck/Guangxi/13/2004
2.5	AB189061.1	A/crow/Osaka/102/2004
3	AF509016.1	A/Chicken/HongKong/FY77/01
4	DQ997405.1	A/goose/Fujian/bb/2003
5	DQ320879.1	A/duck/Guangxi/668/2004
6	DQ997094.1	A/duck/Hubei/wg/2002
7.1	HM172113.1	A/chicken/Shanxi/10/2006
7.2	FJ842480.1	A/chicken/Vietnam/NCVD-093/2008
7	DQ343150.1	A/chicken/Hebei/326/2005
7	EF587277.1	A/Beijing/01/2003
8	AY651349.1	A/Ck/HK/YU22/2002
9	HM172095.1	A/chicken-Anhui/39/2004
HA nucleotide sequence of 178 Thailand strains
Clade	Accession Number	Strain
1	AB440324	A/chicken/Suphanburi/1/2004
1	AB440325	A/duck-Angthong/72/2004
1	AB440326	A/quail-Angthong/71/2004
1	AB450550	A/chicken/Kalasin/NIAH316/2004
1	AB450551	A/chicken/Kalasin/NIAH317/2004
1	AB450552	A/chicken/KohnKaen/NIAH330/2004
1	AB450553	A/duck/PhangNga/NIAH181/2004
1	AB450554	A/quail/Phathumthani/NIAH2711/2004
1	AB450555	A/chicken/Nonthaburi/NIAH2879/2004
1	AB450556	A/chicken/NaraThiwat/NIAH1703/2004
1	AB450557	A/chicken/Loei/NIAH2373/2004
1	AB450558	A/chicken/Samutprakan/NIAH6604/2004
1	AB450559	A/chicken/NakhonSawan/NIAH01502/2004
1	AB450560	A/chicken/NakhonSawan/NIAH01503/2004
1	AB450561	A/chicken/Suphanburi/NIAH7540/2004
1	AB450562	A/chicken/Suphanburi/NIAH7618/2004
1	AB450563	A/duck-Angthong/NIAH8246/2004
1	AB450564	A/chicken-Angthong/NIAH8334/2004
1	AB450565	A/chicken/Suphanburi/NIAH108192/2005
1	AB450566	A/quail/NakhonPathom/NIAH7562/2005
1	AB450567	A/chicken/Kalasin/NIAH3776/2005
1	AB450568	A/chicken/Phichit/NIAH606988/2006
1	AB450569	A/open-billstork/Thailand/VSMU-2-NSN/2004
1	AB450570	A/open-billstork/Thailand/VSMU-9-BKK/2004
1	AB450571	A/open-billstork/Thailand/VSMU-20-AYA/2004
1	AB450572	A/commonmyna/Thailand/VSMU-10-BRM/2005
1	AB450573	A/pigeon/Thailand/VSMU-11-KRI/2005
1	AB450574	A/pigeon/Thailand/VSMU-13-KRI/2005
1	AB450575	A/treesparrow/Thailand/VSMU-12-KRI/2005
1	AB450576	A/treesparrow/Thailand/VSMU-14-KRI/2005
1	AB450577	A/open-billstork/Thailand/VSMU-15-ATG/2005
1	AB450578	A/treesparrow/Ratchaburi/VSMU-16-RBR/2005
1	AB450579	A/open-billstork/Thailand/VSMU-29-NSN/2005
1	AB576202	A/pigeon/Thailand/VSMU-7-NPT/2004
1	AY553802	A/littlegrebe/Thailand/Phichit-01/2004
1	AY555150	A/Thailand/1(KAN-1)/2004
1	AY555153	A/Thailand/2(SP-33)/2004
1	AY577314	A/Thailand/3(SP-83)/2004
1	AY626143	A/Thailand/4(SP-528)/2004
1	AY627885	A/Thailand/5(KK-494)/2004
1	AY646167	A/tiger/Suphanburi/Thailand/Ti-1/2004
1	AY646175	A/leopard/Suphanburi/Thailand/Leo-1/2004
1	AY649382	A/chicken/Thailand/CH-2/2004
1	AY679514	A/Thailand/LFPN-2004/2004
1	AY834279	A/Tiger/Thailand/VSMU-1-SPB/2004
1	AY866475	A/tiger/Thailand/CU-T7/2004
1	AY972539	A/tiger/Thailand/CU-T4/2004
1	AY972541	A/tiger/Thailand/CU-T6/2004
1	CY047457.1	A/chicken/Thailand/CU-354/2008
1	CY111598	A/Thailand/1(KAN-1)/2004
1	DQ076201	A/Ck/Thailand/73/2004
1	DQ083551	A/chicken/Bangkok/Thailand/CU-3/2004
1	DQ083563	A/crow/Bangkok/Thailand/CU-15/2004
1	DQ083564	A/whitepeafowl/Bangkok/Thailand/CU-16/2004
1	DQ083565	A/chicken/SaraburiThailand/CU-17/2004
1	DQ083573	A/whitepeafowl/Bangkok/Thailand/CU-29/2004
1	DQ083578	A/chicken/Ratchaburi/Thailand/CU-68/2004
1	DQ083583	A/pigeon/SamutPrakan/Thailand/CU-202/2004
1	DQ083584	A/sparrow/Phang-Nga/Thailand/CU-203/2004
1	DQ083585	A/Mynas/Ranong/Thailand/CU-209/04
1	DQ236077	A/cat/Thailand/KU-02/2004
1	DQ236085	A/pigeon/Thailand/KU-03/2004
1	DQ334760	A/chicken/Thailand/Kanchanaburi/CK-160/2005
1	DQ334768	A/quail/Thailand/NakhonPathom/QA-161/2005
1	DQ334776	A/chicken/Thailand/Nontaburi/CK-162/2005
1	DQ360835.1	A/Thailand/676/2005
1	DQ989961	A/open-billedstork/NakhonSawan/BBD0104F/2004
1	DQ989969	A/open-billedstork/NakhonSawan/BBD0404F/2004
1	DQ989979	A/open-billedstork/Suphanburi/TSD0912F/2004
1	DQ989987	A/open-billedstork/NakhonSawan/BBD1521J/2005
1	DQ989995	A/open-billedstork/NakhonSawan/BBD2616F/2005
1	DQ990003	A/open-billedstork/NakhonSawan/BBA3011M/2005
1	DQ999880	A/chicken/Thailand/PC-168/2006
1	DQ999887	A/chicken/Thailand/PC-170/2006
1	EF107522	A/Thailand/1(KAN-1A)/2004
1	EF112271	A/open-billedstork/Bangkok/LBD0111F/2004
1	EF112272	A/open-billedstork/Bangkok/LBD0511F/2004
1	EF112273	A/open-billedstork/NakhonSawan/BBD1221J/2005
1	EF112274	A/open-billedstork/NakhonSawan/BBD1421J/2005
1	EF112275	A/open-billedstork/NakhonSawan/BBD1621J/2005
1	EF112276	A/open-billedstork/NakhonSawan/BBD1721J/2005
1	EF112277	A/open-billedstork/NakhonSawan/BBD1821J/2005
1	EF112278	A/open-billedstork/NakhonSawan/BBD2316F/2005
1	EF112279	A/open-billedstork/NakhonSawan/BBD2416F/2005
1	EF112280	A/open-billedstork/NakhonSawan/BBD3009M/2005
1	EF112281	A/open-billedstork/NakhonSawan/BBD3209M/2005
1	EF112282	A/open-billedstork/NakhonSawan/BBD3309M/2005
1	EF112283	A/open-billedstork/NakhonSawan/BBD3509M/2005
1	EF112284	A/open-billedstork/NakhonSawan/BBA2611M/2005
1	EF112285	A/open-billedstork/NakhonSawan/BBA2811M/2005
1	EF112286	A/open-billedstork/NakhonSawan/BBA2911M/2005
1	EF112287	A/open-billedstork/NakhonSawan/BBD4011M/2005
1	EF112288	A/open-billedstork/NakhonSawan/BBD4211M/2005
1	EF112289	A/open-billedstork/NakhonSawan/BBD4411M/2005
1	EF112290	A/open-billedstork/NakhonSawan/BBD3516M/2005
1	EF112291	A/open-billedstork/NakhonSawan/BBD3616M/2005
1	EF112292	A/open-billedstork/NakhonSawan/BBA0627May/2005
1	EF178506	A/treesparrow/Thailand/VSMU-16-RBR/2005
1	EF178517	A/goldenpheasant/Thailand/VSMU-21-SPB/2005
1	EF178528	A/brown-headed-gull/Thailand/VSMU-28-SPK/2005
1	EF178531	A/tiger/Thailand/VSMU-11-SPB/2004
1	EF178532	A/tiger/Thailand/VSMU-23-CBI/2004
1	EF206696	A/gray-crowedcrane/Thailand/VSMU-4-CBI/2005
1	EF206697	A/greatbarbet/Thailand/VSMU-2-CBI/2005
1	EF206698	A/pigeon/Thailand/VSMU-25-BKK/2005
1	EF206699	A/open-billedStork/Thailand/VSMU-15-ATG/2005
1	EF206700	A/greenpeafowl/Thailand/VSMU-3-CBI/2005
1	EF541392	A/Prachinburi/6231/2004
1	EF541408	A/Thailand/16/2004
1	EF541410	A/Thailand/SP83/2004
1	EF541411	A/Thailand/Kan353/2004
1	EF541417	A/Thailand/Chaiyaphum/622/2004
1	EF568922	A/chicken/Suphanburi/137/2005
1	EF593102	A/chicken/Thailand/vsmu-3-BKK/2004
1	EU233416	A/chicken/Thailand/ICRC-V143/2007
1	EU268219	A/Thailand/16/2004
1	EU497919	A/chicken/Thailand/ICRC-V586/2008
1	EU497920	A/chicken/Thailand/ICRC-195/2007
1	EU497921	A/chicken/Thailand/ICRC-213/2007
1	EU547798	A/chicken/Thailand/ICRC-618/2008
1	EU616851	A/quail/Thailand/CU-330/2006
1	EU616859	A/quail/Thailand/CU-331/2006
1	EU616867	A/quail/Thailand/CU-332/2006
1	EU620652	A/chicken/Thailand/NS-339/2008
1	EU676307	A/duck/Thailand/ICRC-V629/2008
1	EU676317	A/Kalij-pheasant/Thailand/vsmu-1/2008
1	EU676325	A/brown-head-gull/Thailand/vsmu-4/2008
1	EU850416	A/chicken/Thailand/NS-341/2008
1	EU919137	A/chicken/Phichit/NIAH1/2006
1	EU919138	A/chicken/Phichit/NIAH600674/2008
1	EU919139	A/chicken/NakhonSawan/NIAH6006587/2008
1	EU919140	A/chicken-Angthong/NIAH101204/2007
1	FJ265565	A/quail/Thailand/Phichit-01/2004
1	FJ265566	A/pigeon/Thailand/Uttaradit-01/2004
1	FJ265567	A/sparrow/Thailand/Phitsanulok-01/2004
1	FJ265569	A/chicken/Nakornsawan/NIAH6-3-0009/2005
1	FJ265570	A/duck/Uthaithani/NIAH6-3-0008/2005
1	FJ265571	A/chicken/Thailand/Phitsanulok/NIAH6-3-0012/2005
1	FJ265572	A/chicken/Uthaithani/NIAH6-3-0007/2005
1	FJ265573	A/chicken/Thailand/Kamphaengphet/NIAH6-3-0006/2005
1	FJ265574	A/chicken/Thailand/Kamphaengphet/NIAH6-3-0008/2005
1	FJ265575	A/chicken/Thailand/Kamphaengphet/NIAH6-3-0009/2005
1	FJ265576	A/chicken/Thailand/Kamphaengphet/NIAH6-3-0010/2005
1	FJ265577	A/chicken/Thailand/Sukhothai/NIAH6-3-0013/2005
1	FJ455874	A/chicken/Sukhothai/NIAH114843/2008
1	FJ743696	A/chicken/Uthaithani/NIAH115067/2008
1	FJ868014	A/chicken/Thailand/ST-351/2008
1	FJ868025	A/chicken/Sukhothai/NIAH114843/2008
1	FJ868033	A/chicken/Uthaithani/NIAH115067/2008
1	GQ466176	A/Thailand/NBL1/2006
1	GU052433	A/pigeon/Thailand/1B/2004
1	GU186640	A/unknown/Prachinburi(Thailand)/6231/2004
1	GU186648	A/duck-AngThong/71(2)/2004
1	HM590781	A/environment/Thailand/ICRC-6670/2010
1	HM590789	A/chicken/Thailand/ICRC-7356/2010
1	HM590797	A/chicken/Thailand/ICRC-7372/2010
1	HM627913	A/open-billedstork/Thailand/VSMU-4-NSN/2004
1	HM627921	A/open-billedstork/Thailand/VSMU-5-NSN/2004
1	HM627929	A/open-billedstork/Thailand/VSMU-6-BKK/2004
1	HM627937	A/open-billedstork/Thailand/VSMU-8-BKK/2004
1	HM627945	A/open-billedstork/Thailand/VSMU-12-BKK/2003
1	HQ025949	A/Silver-Pheasant/Thailand/VSMU-1-CBI/2005
1	JN634875	A/chicken/Thailand/KU14/2004
1	JQ794446	A/duck/Thailand/TS01/2006
1	JQ794454	A/chicken/Thailand/TS02/2006
1	JQ794462	A/chicken/Thailand/TS03/2006
1	JQ794470	A/duck/Thailand/TS04/2006
1	JQ794478	A/pigeon/Thailand/TS01/2007
1	KJ907470	A/Thailand/NBL1/2006
1	KJ907478	A/Thailand/NBL1/2006
1	MG668907	A/Thailand/NBL1/2006
1	MG668915	A/Thailand/NBL1/2006
1	MG668923	A/Thailand/NBL1/2006
1	MG668931	A/Thailand/NBL1/2006
2.3.4	DQ999872	A/chicken/Thailand/NP-172/2006
2.3.4	EF419243	A/chicken/Nongkhai/NIAH400802/2007
2.3.4	EU221249	A/duck/Nong-Khai/Thailand/KU-56/2007
2.3.4	EU919136	A/chicken/Mukdahan/NIAH403901/2007

## Sheet: Raw data for Fig 2
NA nucleotide sequences of H5N1 viruses analyzed in Figure 2 of the present study
NA nucleotide sequences corresponding to H5 Clade reference strains
Clade	Accession Number	Strain
0	AF144304	A/Goose/Guangdong/1/96/1996-01-01
1.1.1	AB727937	A/duck/Vietnam/OIE-0062/2012/2012-02-19
1.1.1	HQ200598	A/Cambodia/S1211394/2008/2008-12-11
1.1.2	JN588855	A/Cambodia/U0417030/2010/2010-04-18
1.1.2	JX826583	A/duck/Vietnam/ST0970/2009/2009-02-18
1.1	CY029529	A/duck/Vietnam/1233/2005/2005-01-01
1	CY047459	A/chicken/Thailand/CU-354/2008/2008-11-14
1	DQ360836	A/Thailand/676/2005/2005-01-01
1	HM114467	A/Vietnam/UT3030/2003/2003-12-29
2.1.1	CY029274	A/duck/Hunan/795/2002/2002-01-01
2.1.2	DQ493018	A/turkey/Kedaton/BPPV3/2004/2004-01-01
2.1.3	GQ122493	A/chicken/Central_Java/UT3091/2005/2005-01-01
2.2	DQ659325	A/Bar_headed_goose/Qinghai/1A/2005/2005-01-01
2.2	EF205169	A/chicken/Omsk/14/05/2005-01-01
2.3.1	HM172178	A/duck/Hunan/70/2004/2004-01-01
2.3.2	HM172210	A/duck/Guangdong/23/2004/2004-01-01
2.3.3	EF124305	A/chicken/Guiyang/3055/2005/2005-01-01
2.3.4	EU128239	A/Anhui/1/2005/2005-11-08
2.3.4	HM172189	A/Anhui/1/2005/2005-11-08
2.4	DQ095664	A/Chicken/Yunnan/447/05/2005-01-01
2.4	DQ366340	A/duck/Guangxi/13/2004/2004-01-01
2.5	AB189063	A/crow/Osaka/102/2004/2004-01-01
3	AF509092	A/Chicken/Hong_Kong/FY77/01/2001-01-01
4	DQ997406	A/goose/Fujian/bb/2003/2003-01-01
6	DQ997095	A/duck/Hubei/wg/2002/2002-01-01
7.1	HM172172	A/chicken/Shanxi/10/2006/2006-01-01
7.2	FJ538949	A/chicken/Vietnam/NCVD-093/2008/2008-01-01
7	DQ349118	A/chicken/Hebei/326/2005/2005-01-01
7	EF587279	A/Beijing/01/2003/2003-01-01
8	AY651461	A/Ck/HK/YU22/2002/2002-01-01
9	HM172180	A/chicken/Anhui/39/2004/2004-01-01
NA nucleotide sequence of 143 Thailand strains
Accession Number	Strain
AB440327	A/chicken/Suphanburi/1/2004
AB440328	A/duck/Angthong/72/2004
AB440329	A/quail/Angthong/71/2004
AB450596	A/chicken/Kalasin/NIAH316/2004
AB450597	A/chicken/Kalasin/NIAH317/2004
AB450598	A/chicken/KohnKaen/NIAH330/2004
AB450599	A/duck/PhangNga/NIAH181/2004
AB450600	A/quail/Phathumthani/NIAH2711/2004
AB450601	A/chicken/Nonthaburi/NIAH2879/2004
AB450602	A/chicken/NaraThiwat/NIAH1703/2004
AB450603	A/chicken/Loei/NIAH2373/2004
AB450604	A/chicken/Samutprakan/NIAH6604/2004
AB450605	A/chicken/NakhonSawan/NIAH01502/2004
AB450606	A/chicken/NakhonSawan/NIAH01503/2004
AB450607	A/chicken/Suphanburi/NIAH7540/2004
AB450608	A/chicken/Suphanburi/NIAH7618/2004
AB450609	A/duck/Angthong/NIAH8246/2004
AB450610	A/chicken/Angthong/NIAH8334/2004
AB450611	A/chicken/Suphanburi/NIAH108192/2005
AB450612	A/quail/NakhonPathom/NIAH7562/2005
AB450613	A/chicken/Kalasin/NIAH3776/2005
AB450614	A/chicken/Phichit/NIAH606988/2006
AB450615	A/open-billstork/Thailand/VSMU-2-NSN/2004
AB450616	A/open-billstork/Thailand/VSMU-9-BKK/2004
AB450617	A/open-billstork/Thailand/VSMU-20-AYA/2004
AB450618	A/commonmyna/Thailand/VSMU-10-BRM/2005
AB450619	A/pigeon/Thailand/VSMU-11-KRI/2005
AB450620	A/pigeon/Thailand/VSMU-13-KRI/2005
AB450621	A/treesparrow/Thailand/VSMU-12-KRI/2005
AB450622	A/treesparrow/Thailand/VSMU-14-KRI/2005
AB450623	A/open-billstork/Thailand/VSMU-15-ATG/2005
AB450624	A/treesparrow/Ratchaburi/VSMU-16-RBR/2005
AB450625	A/open-billstork/Thailand/VSMU-29-NSN/2005
AB576204	A/pigeon/Thailand/VSMU-7-NPT/2004
AY553832	A/littlegrebe/Thailand/Phichit-01/2004
AY555151	A/Thailand/1(KAN-1)/2004
AY555152	A/Thailand/2(SP-33)/2004
AY577315	A/Thailand/3(SP-83)/2004
AY577316	A/Thailand/4(SP-528)/2004
AY627886	A/Thailand/5(KK-494)/2004
AY649383	A/chicken/Thailand/CH-2/2004
AY651438	A/Ck/Thailand/73/2004
AY651439	A/Ck/Thailand/1/2004
AY651440	A/Ck/Thailand/9.1/2004
AY651441	A/bird/Thailand/3.1/2004
AY651442	A/Qa/Thailand/57/2004
AY651444	A/Gs/Thailand/79/2004
AY679513	A/Thailand/LFPN-2004/2004
AY834280	A/Tiger/Thailand/VSMU-1-SPB/2004
CY047453	A/chicken/Thailand/CU-353/2008
CY111600	A/Thailand/1(KAN-1)/2004
DQ076202	A/Ck/Thailand/73/2004
DQ083600	A/whitepeafowl/Bangkok/Thailand/CU-16/2004
DQ236078	A/cat/Thailand/KU-02/2004
DQ236086	A/pigeon/Thailand/KU-03/2004
DQ334762	A/chicken/Thailand/Kanchanaburi/CK-160/2005
DQ334770	A/quail/Thailand/NakhonPathom/QA-161/2005
DQ360836	A/Thailand/676/2005
DQ372593	A/Thailand/NK165/2005
DQ885620	A/Thailand/NA60/2005
DQ989963	A/open-billedstork/Nakhonsawan/BBD0104F/2004
DQ989971	A/open-billedstork/Nakhonsawan/BBD0404F/2004
DQ989981	A/open-billedstork/Suphanburi/TSD0912F/2004
DQ989989	A/open-billedstork/Nakhonsawan/BBD1521J/2005
DQ989997	A/open-billedstork/Nakhonsawan/BBD2616F/2005
DQ990005	A/open-billedstork/Nakhonsawan/BBA3011M/2005
EF112317	A/open-billedstork/Bangkok/LBD0111F/2004
EF112318	A/open-billedstork/Bangkok/LBD0511F/2004
EF112319	A/open-billedstork/Nakhonsawan/BBD1221J/2005
EF112320	A/open-billedstork/Nakhonsawan/BBD1421J/2005
EF112321	A/open-billedstork/Nakhonsawan/BBD1621J/2005
EF112322	A/open-billedstork/Nakhonsawan/BBD1721J/2005
EF112323	A/open-billedstork/Nakhonsawan/BBD1821J/2005
EF112324	A/open-billedstork/Nakhonsawan/BBD2316F/2005
EF112325	A/open-billedstork/Nakhonsawan/BBD2316F/2005
EF112326	A/open-billedstork/Nakhonsawan/BBD2416F/2005
EF112327	A/open-billedstork/Nakhonsawan/BBD3009M/2005
EF112328	A/open-billedstork/Nakhonsawan/BBD3209M/2005
EF112329	A/open-billedstork/Nakhonsawan/BBD3309M/2005
EF112330	A/open-billedstork/Nakhonsawan/BBD3509M/2005
EF112331	A/open-billedstork/Nakhonsawan/BBA2111M/2005
EF112332	A/open-billedstork/Nakhonsawan/BBA2611M/2005
EF112333	A/open-billedstork/Nakhonsawan/BBA2711M/2005
EF112334	A/open-billedstork/Nakhonsawan/BBA2811M/2005
EF112335	A/open-billedstork/Nakhonsawan/BBA2911M/2005
EF112336	A/open-billedstork/Nakhonsawan/BBA2911M/2005
EF112337	A/open-billedstork/Nakhonsawan/BBA2911M/2005
EF112339	A/open-billedstork/Nakhonsawan/BBD4011M/2005
EF112340	A/open-billedstork/Nakhonsawan/BBD4211M/2005
EF112341	A/open-billedstork/Nakhonsawan/BBD4411M/2005
EF112342	A/open-billedstork/Nakhonsawan/BBD3516M/2005
EF112343	A/open-billedstork/Nakhonsawan/BBD3616M/2005
EF112344	A/open-billedstork/Nakhonsawan/BBA0627May/2005
EF178519	A/goldenpheasant/Thailand/VSMU-21-SPB/2005
EF178530	A/tiger/Thailand/VSMU-11-SPB/2004
EF178533	A/tiger/Thailand/VSMU-23-CBI/2004
EF512562	A/Prachinburi/6231/2004
EF541470	A/Thailand/16/2004
EF541471	A/Thailand/Kan353/2004
EF541472	A/Thailand/SP83/2004
EF541473	A/Thailand/Chaiyaphum/622/2004
EF593104	A/chicken/Thailand/vsmu-3-BKK/2004
EU221251	A/duck/Nong-Khai/Thailand/KU-56/2007
EU233418	A/chicken/Thailand/ICRC-V143/2007
EU268221	A/Thailand/16/2004
EU616826	A/moorhen/Thailand/CU-317/2006
EU616832	A/quail/Thailand/CU-320/2006
EU620661	A/chicken/Thailand/PC-340/2008
EU669188	A/chicken/Thailand/ICRC-195/2007
EU669199	A/chicken/Thailand/ICRC-V586/2008
EU676311	A/duck/Thailand/ICRC-V629/2008
EU676319	A/Kalijpheasant/Thailand/vsmu-1/2008
EU676327	A/brown-headgull/Thailand/vsmu-4/2008
EU875388	A/chicken/Thailand/ICRC-618/2008
FJ750814	A/chicken/Uthaithani/NIAH115067/2008
FJ750821	A/chicken/Sukhothai/NIAH114843/2008
FJ868016	A/chicken/Thailand/ST-351/2008
FJ868027	A/chicken/Sukhothai/NIAH114843/2008
FJ868035	A/chicken/Uthaithani/NIAH115067/2008
GQ466177	A/Thailand/NBL1/2006
GU052435	A/pigeon/Thailand/1B/2004
GU186642	A/unknown/Prachinburi(Thailand)/6231/2004
GU186650	A/duck/AngThong/71(2)/2004
HM590791	A/chicken/Thailand/ICRC-7356/2010
HM590799	A/chicken/Thailand/ICRC-7372/2010
HM627915	A/openbillstork/Thailand/VSMU-4-NSN/2004
HM627923	A/openbillstork/Thailand/VSMU-5-NSN/2004
HM627931	A/openbillstork/Thailand/VSMU-6-BKK/2004
HM627939	A/openbillstork/Thailand/VSMU-8-BKK/2004
HM627947	A/openbillstork/Thailand/VSMU-12-BKK/2003
HQ025951	A/SilverPheasant/Thailand/VSMU-1-CBI/2005
JN634876	A/chicken/Thailand/KU14/2004
JQ794448	A/duck/Thailand/TS01/2006
JQ794456	A/chicken/Thailand/TS02/2006
JQ794465	A/chicken/Thailand/TS03/2006
JQ794472	A/duck/Thailand/TS04/2006
JQ794480	A/pigeon/Thailand/TS01/2007
KJ907472	A/Thailand/NBL1/2006
KJ907480	A/Thailand/NBL1/2006
MG668909	A/Thailand/NBL1/2006
MG668917	A/Thailand/NBL1/2006
MG668925	A/Thailand/NBL1/2006
MG668933	A/Thailand/NBL1/2006

## Sheet: Raw data for Fig 3
HA nucleotide sequences of H5N1 viruses analyzed in Figure 3 of the present study
Accession Number	Strain
AB440324	A/chicken/Suphanburi/1/2004
AB440325	A/duck-Angthong/72/2004
AB440326	A/quail-Angthong/71/2004
AB450550	A/chicken/Kalasin/NIAH316/2004
AB450551	A/chicken/Kalasin/NIAH317/2004
AB450552	A/chicken/KohnKaen/NIAH330/2004
AB450553	A/duck/PhangNga/NIAH181/2004
AB450554	A/quail/Phathumthani/NIAH2711/2004
AB450555	A/chicken/Nonthaburi/NIAH2879/2004
AB450556	A/chicken/NaraThiwat/NIAH1703/2004
AB450557	A/chicken/Loei/NIAH2373/2004
AB450558	A/chicken/Samutprakan/NIAH6604/2004
AB450559	A/chicken/NakhonSawan/NIAH01502/2004
AB450560	A/chicken/NakhonSawan/NIAH01503/2004
AB450561	A/chicken/Suphanburi/NIAH7540/2004
AB450562	A/chicken/Suphanburi/NIAH7618/2004
AB450563	A/duck-Angthong/NIAH8246/2004
AB450564	A/chicken-Angthong/NIAH8334/2004
AB450565	A/chicken/Suphanburi/NIAH108192/2005
AB450566	A/quail/NakhonPathom/NIAH7562/2005
AB450567	A/chicken/Kalasin/NIAH3776/2005
AB450568	A/chicken/Phichit/NIAH606988/2006
AB450569	A/open-billstork/Thailand/VSMU-2-NSN/2004
AB450570	A/open-billstork/Thailand/VSMU-9-BKK/2004
AB450571	A/open-billstork/Thailand/VSMU-20-AYA/2004
AB450572	A/commonmyna/Thailand/VSMU-10-BRM/2005
AB450573	A/pigeon/Thailand/VSMU-11-KRI/2005
AB450574	A/pigeon/Thailand/VSMU-13-KRI/2005
AB450575	A/treesparrow/Thailand/VSMU-12-KRI/2005
AB450576	A/treesparrow/Thailand/VSMU-14-KRI/2005
AB450577	A/open-billstork/Thailand/VSMU-15-ATG/2005
AB450578	A/treesparrow/Ratchaburi/VSMU-16-RBR/2005
AB450579	A/open-billstork/Thailand/VSMU-29-NSN/2005
AB576202	A/pigeon/Thailand/VSMU-7-NPT/2004
AY553802	A/littlegrebe/Thailand/Phichit-01/2004
AY555150	A/Thailand/1(KAN-1)/2004
AY555153	A/Thailand/2(SP-33)/2004
AY577314	A/Thailand/3(SP-83)/2004
AY626143	A/Thailand/4(SP-528)/2004
AY627885	A/Thailand/5(KK-494)/2004
AY646167	A/tiger/Suphanburi/Thailand/Ti-1/2004
AY646175	A/leopard/Suphanburi/Thailand/Leo-1/2004
AY649382	A/chicken/Thailand/CH-2/2004
AY834279	A/Tiger/Thailand/VSMU-1-SPB/2004
AY866475	A/tiger/Thailand/CU-T7/2004
AY972539	A/tiger/Thailand/CU-T4/2004
AY972541	A/tiger/Thailand/CU-T6/2004
CY047457	A/chicken/Thailand/CU-354/2008
CY111598	A/Thailand/1(KAN-1)/2004
DQ076201	A/Ck/Thailand/73/2004
DQ083551	A/chicken/Bangkok/Thailand/CU-3/2004
DQ083563	A/crow/Bangkok/Thailand/CU-15/2004
DQ083564	A/whitepeafowl/Bangkok/Thailand/CU-16/2004
DQ083565	A/chicken/SaraburiThailand/CU-17/2004
DQ083573	A/whitepeafowl/Bangkok/Thailand/CU-29/2004
DQ083578	A/chicken/Ratchaburi/Thailand/CU-68/2004
DQ083583	A/pigeon/SamutPrakan/Thailand/CU-202/2004
DQ083584	A/sparrow/Phang-Nga/Thailand/CU-203/2004
DQ083585	A/Mynas/Ranong/Thailand/CU-209/04
DQ236077	A/cat/Thailand/KU-02/2004
DQ236085	A/pigeon/Thailand/KU-03/2004
DQ320934	A/chicken/Malaysia/5858/2004/2004-01-01
DQ334760	A/chicken/Thailand/Kanchanaburi/CK-160/2005
DQ334768	A/quail/Thailand/NakhonPathom/QA-161/2005
DQ334776	A/chicken/Thailand/Nontaburi/CK-162/2005
DQ989961	A/open-billedstork/NakhonSawan/BBD0104F/2004
DQ989969	A/open-billedstork/NakhonSawan/BBD0404F/2004
DQ989979	A/open-billedstork/Suphanburi/TSD0912F/2004
DQ989987	A/open-billedstork/NakhonSawan/BBD1521J/2005
DQ989995	A/open-billedstork/NakhonSawan/BBD2616F/2005
DQ990003	A/open-billedstork/NakhonSawan/BBA3011M/2005
DQ999880	A/chicken/Thailand/PC-168/2006
DQ999887	A/chicken/Thailand/PC-170/2006
EF107522	A/Thailand/1(KAN-1A)/2004
EF112271	A/open-billedstork/Bangkok/LBD0111F/2004
EF112272	A/open-billedstork/Bangkok/LBD0511F/2004
EF112273	A/open-billedstork/NakhonSawan/BBD1221J/2005
EF112274	A/open-billedstork/NakhonSawan/BBD1421J/2005
EF112275	A/open-billedstork/NakhonSawan/BBD1621J/2005
EF112276	A/open-billedstork/NakhonSawan/BBD1721J/2005
EF112277	A/open-billedstork/NakhonSawan/BBD1821J/2005
EF112278	A/open-billedstork/NakhonSawan/BBD2316F/2005
EF112279	A/open-billedstork/NakhonSawan/BBD2416F/2005
EF112280	A/open-billedstork/NakhonSawan/BBD3009M/2005
EF112281	A/open-billedstork/NakhonSawan/BBD3209M/2005
EF112282	A/open-billedstork/NakhonSawan/BBD3309M/2005
EF112283	A/open-billedstork/NakhonSawan/BBD3509M/2005
EF112284	A/open-billedstork/NakhonSawan/BBA2611M/2005
EF112285	A/open-billedstork/NakhonSawan/BBA2811M/2005
EF112286	A/open-billedstork/NakhonSawan/BBA2911M/2005
EF112287	A/open-billedstork/NakhonSawan/BBD4011M/2005
EF112288	A/open-billedstork/NakhonSawan/BBD4211M/2005
EF112289	A/open-billedstork/NakhonSawan/BBD4411M/2005
EF112290	A/open-billedstork/NakhonSawan/BBD3516M/2005
EF112291	A/open-billedstork/NakhonSawan/BBD3616M/2005
EF112292	A/open-billedstork/NakhonSawan/BBA0627May/2005
EF178517	A/goldenpheasant/Thailand/VSMU-21-SPB/2005
EF178528	A/brown-headed-gull/Thailand/VSMU-28-SPK/2005
EF178531	A/tiger/Thailand/VSMU-11-SPB/2004
EF178532	A/tiger/Thailand/VSMU-23-CBI/2004
EF206696	A/gray-crowedcrane/Thailand/VSMU-4-CBI/2005
EF206697	A/greatbarbet/Thailand/VSMU-2-CBI/2005
EF206698	A/pigeon/Thailand/VSMU-25-BKK/2005
EF206699	A/open-billedStork/Thailand/VSMU-15-ATG/2005
EF206700	A/greenpeafowl/Thailand/VSMU-3-CBI/2005
EF541392	A/Prachinburi/6231/2004
EF541408	A/Thailand/16/2004
EF541410	A/Thailand/SP83/2004
EF541411	A/Thailand/Kan353/2004
EF541413	A/chicken/Laos/7191/2004/2004-01-01
EF541414	A/chicken/Laos/7192/2004/2004-01-01
EF541417	A/Thailand/Chaiyaphum/622/2004
EF568922	A/chicken/Suphanburi/137/2005
EF593102	A/chicken/Thailand/vsmu-3-BKK/2004
EU233416	A/chicken/Thailand/ICRC-V143/2007
EU268219	A/Thailand/16/2004
EU497919	A/chicken/Thailand/ICRC-V586/2008
EU497920	A/chicken/Thailand/ICRC-195/2007
EU497921	A/chicken/Thailand/ICRC-213/2007
EU547798	A/chicken/Thailand/ICRC-618/2008
EU616851	A/quail/Thailand/CU-330/2006
EU616859	A/quail/Thailand/CU-331/2006
EU616867	A/quail/Thailand/CU-332/2006
EU620652	A/chicken/Thailand/NS-339/2008
EU676307	A/duck/Thailand/ICRC-V629/2008
EU676317	A/Kalij-pheasant/Thailand/vsmu-1/2008
EU676325	A/brown-head-gull/Thailand/vsmu-4/2008
EU850416	A/chicken/Thailand/NS-341/2008
EU919137	A/chicken/Phichit/NIAH1/2006
EU919138	A/chicken/Phichit/NIAH600674/2008
EU919139	A/chicken/NakhonSawan/NIAH6006587/2008
EU919140	A/chicken-Angthong/NIAH101204/2007
FJ265565	A/quail/Thailand/Phichit-01/2004
FJ265566	A/pigeon/Thailand/Uttaradit-01/2004
FJ265567	A/sparrow/Thailand/Phitsanulok-01/2004
FJ265569	A/chicken/Nakornsawan/NIAH6-3-0009/2005
FJ265570	A/duck/Uthaithani/NIAH6-3-0008/2005
FJ265571	A/chicken/Thailand/Phitsanulok/NIAH6-3-0012/2005
FJ265572	A/chicken/Uthaithani/NIAH6-3-0007/2005
FJ265573	A/chicken/Thailand/Kamphaengphet/NIAH6-3-0006/2005
FJ265574	A/chicken/Thailand/Kamphaengphet/NIAH6-3-0008/2005
FJ265575	A/chicken/Thailand/Kamphaengphet/NIAH6-3-0009/2005
FJ265576	A/chicken/Thailand/Kamphaengphet/NIAH6-3-0010/2005
FJ265577	A/chicken/Thailand/Sukhothai/NIAH6-3-0013/2005
FJ455874	A/chicken/Sukhothai/NIAH114843/2008
FJ743696	A/chicken/Uthaithani/NIAH115067/2008
FJ868014	A/chicken/Thailand/ST-351/2008
FJ868033	A/chicken/Uthaithani/NIAH115067/2008
GQ466176	A/Thailand/NBL1/2006
GU052433	A/pigeon/Thailand/1B/2004
GU186640	A/unknown/Prachinburi(Thailand)/6231/2004
GU186648	A/duck-AngThong/71(2)/2004
HM590781	A/environment/Thailand/ICRC-6670/2010
HM590789	A/chicken/Thailand/ICRC-7356/2010
HM590797	A/chicken/Thailand/ICRC-7372/2010
HM627913	A/open-billedstork/Thailand/VSMU-4-NSN/2004
HM627921	A/open-billedstork/Thailand/VSMU-5-NSN/2004
HM627929	A/open-billedstork/Thailand/VSMU-6-BKK/2004
HM627937	A/open-billedstork/Thailand/VSMU-8-BKK/2004
HM627945	A/open-billedstork/Thailand/VSMU-12-BKK/2003
HQ025949	A/Silver-Pheasant/Thailand/VSMU-1-CBI/2005
JN634875	A/chicken/Thailand/KU14/2004
JQ794446	A/duck/Thailand/TS01/2006
JQ794454	A/chicken/Thailand/TS02/2006
JQ794462	A/chicken/Thailand/TS03/2006
JQ794470	A/duck/Thailand/TS04/2006
JQ794478	A/pigeon/Thailand/TS01/2007
KJ907470	A/Thailand/NBL1/2006
AB212054	A/Hong_Kong/213/03/2003-01-01
AF148678.1	A/goose/Guangdong/1/96/1996
AY651337	A/chicken/Viet_Nam/33/2004/2004-01-01
AY676033	A/duck/Hong_Kong/821/2002/2002-01-01
CY028968	A/duck/Hunan/1386/2003/2003-01-01
CY028977	A/duck/Yunnan/662/2003/2003-01-01
CY029937	A/chicken/Vietnam/15/2004/2004-01-01
CY034206	A/chicken/Vietnam/890/2004/2004-01-01
DQ099755	A/chicken/Viet_Nam/TN-025/2004/2004-01-01
DQ320926	A/chicken/Hong_Kong/3123.1/2002/2002-01-01
DQ320938	A/chicken/Vietnam/27/2003/2003-01-01
DQ497670	A/duck/Vietnam/15/2003/2003-01-01
DQ497671	A/mallard/Vietnam/16/2003/2003-01-01
DQ497672	A/duck/Vietnam/17/2003/2003-01-01
DQ497677	A/mallard/Vietnam/352/2005/2005-01-01
DQ497678	A/chicken/Vietnam/19/2003/2003-01-01
DQ497679	A/chicken/Vietnam/20/2003/2003-01-01
DQ497680	A/mallard/Vietnam/21/2003/2003-01-01
DQ497682	A/chicken/Vietnam/30/2003/2003-01-01
DQ497688	A/duck/Vietnam/N-TB/2005/2005-01-01
DQ497690	A/mallard/Vietnam/3/2003/2003-01-01
DQ497691	A/chicken/Vietnam/4/2003/2003-01-01
DQ497692	A/chicken/Vietnam/5/2003/2003-01-01
DQ497693	A/chicken/Vietnam/8/2003/2003-01-01
DQ497696	A/chicken/Vietnam/149/2004/2004-01-01
DQ497712	A/chicken/Vietnam/393/2005/2005-01-01
DQ497720	A/Vietnam/CL02/2004/2004-01-01
EF456805	A/Cambodia/JP52a/2005/2005-01-01
EF473069	A/chicken/Cambodia/7/2004/2004-01-12
EF473070	A/goose/Cambodia/28/2004/2004-01-16
EF473074	A/chicken/Cambodia/022LC3b/2005/2005-01-01
EF541404	A/Viet_Nam/1204/2004/2004-01-01
EU124134	A/Duck/Vietnam/Dong_Thap_680A/2005/2005-11-21
EU124168	A/Chicken/Vietnam/Long_An_636/2005/2005-11-21
GQ149237	A/Vietnam/1194/2004/2004-01-01
HM114449	A/Vietnam/UT3028/2003/2003-12-28
HM114497	A/Vietnam/UT3047III/2004/2004-01-20
HQ200428	A/duck/Cambodia/D2KP/2006/2006-04-04
HQ200458	A/Cambodia/P0322095/2005/2005-03-22
HQ200519	A/duck/Cambodia/D3KP/2006/2006-03-24
HQ200554	A/chicken/Cambodia/047LC3b/2005/2005-03-24
HQ200590	A/chicken/Cambodia/047LC3/2005/2005-01-01
HQ200593	A/duck/Cambodia/D1KP/2006/2006-01-01
HQ200595	A/duck/Cambodia/D1KC/2006/2006-01-01
HQ636434	A/chicken/Cambodia/013LC2b/2005/2005-02-04

## Sheet: Raw data for Fig 4
HA nucleotide sequences of H5N1 viruses analyzed in Figure 4 of the present study
Accession Number	Strain
AF148678.1	A/goose/Guangdong/1/96
KY437807	A/chicken/Anhui/QD1/2014
AB979487.1	A/muscovy_duck/Vietnam/LBM635/2014
KM251470	A/duck/Sichuan/NCXN11/2014
KM251471	A/pigeon/Sichuan/NCXN29/2014
KC631941	A/chicken/China/AH/2012
KP735806	A/goose/Shandong/k1201/2009
JX534565.1	A/wild_duck/Shandong/628/2011
EPI420386	A/Guizhou/1/2013
CY098723.1	A/Hunan/1/2009
CY098304.1	A/chicken/Lao/LH2/2010
CY098751.1	A/Hunan/2/2009
CY098737.1	A/Guizhou/1/2009
EPI284550	A/duck/Vietnam/NCVD-293/2009
GU727669.1	A/duck/Eastern_China/108/2008
AB521159.1	A/peregrine_falcon/Hong_Kong/810/2009
CY036269.1	A/peregrine_falcon/Hong_Kong/2142/2008
HM172093.1	A/chicken/Shandong/A-1/2009
EPI353372	A/chicken/Bangladesh/3012/2011
JN795924.1	A/chicken/Bangladesh/11rs1984-30/2011
JQ936703.1	A/chicken/Yangon/182/2010
AB478026.1	A/village_chicken/Kyaing_Tong/2433/2007
EPI284454	A/chicken/Vietnam/NCVD-281/2009
EPI284489	A/chicken/Vietnam/NCVD-035/2008
CY098798	A/environment/Guizhou/2/2009
HM114617.1	A/Vietnam/HN31432M/2008
CY029655	A/duck/Vietnam/37/2007
KR732411	A/duck/Vietnam_SonLa/NCVD-33/2007
HM172096.1	A/chicken/Fujian/1/2007
FJ492883	A/Fujian/1/2007
DQ999872	A/chicken/Thailand/NP-172/2006
AB474082	A/chicken/Hmawbi/517/2007
EU195400	A/Mallard/Huadong/lk/2005
KP233704	A/duck/Hunan/316/2005
EU329186	A/wild_duck/Hunan/211/2005
HM172107	A/duck/Anhui/56/2005
EU195392	A/Mallard/Huadong/S/2005
FJ492882	A/Fujian/1/2005
DQ992842.1	A/Japanese-white-eye/Hong_Kong/1038/2006
DQ992849	A/house_crow/Hong_Kong/2858/2006
CY040926	A/duck/Laos/P0161/2007
CY040974	A/chicken/Laos/P0130/2007
CY034704	A/duck/Laos/P0106/2007
CY040910	A/duck/Laos/P0127/2007
HM172101.1	A/shrike/Tibet/13/2006
GU050349	A/muscovy_duck/Bac_Ninh/07-69/2007
JX420230	A/Muscovy_duck/Hai_Duong/46/2007
DQ095629	A/Duck/Fujian/1734/05/2005
HM172112	A/chicken/Hunan/21/2005
CY040942	A/chicken/Laos/A0464/2007
CY040934	A/duck/Laos/A0301/2007
CY034720	A/chicken/Laos/P0171/2007
EU221249	A/duck/Nong-Khai/Thailand/KU-56/2007
EU919136	A/chicken/Mukdahan/NIAH403901/2007
DQ992776	A/duck/Shantou/13323/2005
CY030881	A/duck/Yunnan/4873/2006
JX420126	A/duck/Soc_Trang/31/2007
CY034688	A/chicken/Laos/P0020/2007
HM172069.1	A/chicken/Sichuan/81/2005
DQ371928.1	A-Anhui/1/2005
HM172070	A/goose/Hubei/65/2005
HM172072	A/Anhui/2/2005
HM006751	A/Chicken/Laos/Xaythiani_26/2006
CY041045	A/chicken/Laos/31/2006
CY040918	A/duck/Laos/P0117/2007
CY040958	A/duck/Laos/A0617/2007
CY040893	A/chicken/Laos/P0001/2007
EF419243	A/chicken/Nongkhai/NIAH400802/2007
CY040899	A/pigeon/Laos/P0022/2007
CY030493	A/goose/Laos/NCVD-39/2007
CY041043.1	A/duck/Laos/22/2006
CY041038	A/duck/Laos/25/2006
DQ993030	A/duck/Guangxi/1258/2006
DQ993023	A/duck/Guangxi/1830/2006
DQ993114	A/chicken/Guangxi/683/2006
FJ492879	A/Hunan/1/2006
GU052486	A/chicken/Hong_Kong/D-06-0947/2006
DQ992836	A/chicken/Hong_Kong/282/2006
CY098655	A/Guangdong/2/2006
EF624256	A/China/2006
DQ992763	A/chicken/Guiyang/29/2006
DQ993028	A/duck/Guangxi/1436/2006
DQ992788	A/duck/Hunan/5152/2005
DQ371930.1	A/Guangxi/1/2005
DQ992733	A/duck/Guangxi/4830/2005
HM114537	A/Vietnam/UT30850/2005
EU931012	A/duck/Vietnam/218/2005
EU930964	A/Muscovy_duck/Vietnam/211/2005
GU052502	A/duck/Hai_Phong/208/2006
EU930892	A/chicken/Vietnam/202/2005
EPI284466	A/chicken/Vietnam/NCVD-279/2009
HM114593.1	A/Vietnam/UT31394II/2008
CY099968.1	A/chicken/Viet_Nam/TMU015/2008
HM114585.1	A/Vietnam/HN31388M1/2007
CY036085.1	A/white-backed_munia/HongKong/828/2007
CY036077.1	A/Japanese_white-eye/Hong_Kong/737/2007
GU050499	A/duck/Thai_Ninh/07-86/2007
GU050531	A/muscovy_duck/Thai_Binh/07-90/2007
KR732410	A/duck/Vietnam_NamDinh/NCVD-88/2007

## Sheet: Raw data for Fig 5
NA nucleotide sequences of H5N1 viruses analyzed in Figure 5 of the present study
Accession Number	Strain
AB440327	A/chicken/Suphanburi/1/2004
AB440328	A/duck/Angthong/72/2004
AB440329	A/quail/Angthong/71/2004
AB450596	A/chicken/Kalasin/NIAH316/2004
AB450597	A/chicken/Kalasin/NIAH317/2004
AB450598	A/chicken/KohnKaen/NIAH330/2004
AB450599	A/duck/PhangNga/NIAH181/2004
AB450600	A/quail/Phathumthani/NIAH2711/2004
AB450601	A/chicken/Nonthaburi/NIAH2879/2004
AB450602	A/chicken/NaraThiwat/NIAH1703/2004
AB450603	A/chicken/Loei/NIAH2373/2004
AB450604	A/chicken/Samutprakan/NIAH6604/2004
AB450605	A/chicken/NakhonSawan/NIAH01502/2004
AB450606	A/chicken/NakhonSawan/NIAH01503/2004
AB450607	A/chicken/Suphanburi/NIAH7540/2004
AB450608	A/chicken/Suphanburi/NIAH7618/2004
AB450609	A/duck/Angthong/NIAH8246/2004
AB450610	A/chicken/Angthong/NIAH8334/2004
AB450611	A/chicken/Suphanburi/NIAH108192/2005
AB450612	A/quail/NakhonPathom/NIAH7562/2005
AB450613	A/chicken/Kalasin/NIAH3776/2005
AB450614	A/chicken/Phichit/NIAH606988/2006
AB450615	A/open-billstork/Thailand/VSMU-2-NSN/2004
AB450616	A/open-billstork/Thailand/VSMU-9-BKK/2004
AB450617	A/open-billstork/Thailand/VSMU-20-AYA/2004
AB450618	A/commonmyna/Thailand/VSMU-10-BRM/2005
AB450619	A/pigeon/Thailand/VSMU-11-KRI/2005
AB450620	A/pigeon/Thailand/VSMU-13-KRI/2005
AB450621	A/treesparrow/Thailand/VSMU-12-KRI/2005
AB450622	A/treesparrow/Thailand/VSMU-14-KRI/2005
AB450623	A/open-billstork/Thailand/VSMU-15-ATG/2005
AB450624	A/treesparrow/Ratchaburi/VSMU-16-RBR/2005
AB450625	A/open-billstork/Thailand/VSMU-29-NSN/2005
AB576204	A/pigeon/Thailand/VSMU-7-NPT/2004
AY553832	A/littlegrebe/Thailand/Phichit-01/2004
AY555151	A/Thailand/1(KAN-1)/2004
AY555152	A/Thailand/2(SP-33)/2004
AY577315	A/Thailand/3(SP-83)/2004
AY577316	A/Thailand/4(SP-528)/2004
AY627886	A/Thailand/5(KK-494)/2004
AY649383	A/chicken/Thailand/CH-2/2004
AY651438	A/Ck/Thailand/73/2004
AY651439	A/Ck/Thailand/1/2004
AY651440	A/Ck/Thailand/9.1/2004
AY651441	A/bird/Thailand/3.1/2004
AY651442	A/Qa/Thailand/57/2004
AY651444	A/Gs/Thailand/79/2004
AY679513	A/Thailand/LFPN-2004/2004
AY834280	A/Tiger/Thailand/VSMU-1-SPB/2004
CY047453	A/chicken/Thailand/CU-353/2008
CY111600	A/Thailand/1(KAN-1)/2004
DQ076202	A/Ck/Thailand/73/2004
DQ083600	A/whitepeafowl/Bangkok/Thailand/CU-16/2004
DQ236078	A/cat/Thailand/KU-02/2004
DQ236086	A/pigeon/Thailand/KU-03/2004
DQ321066	A/chicken/Malaysia/5858/2004/2004-01-01
DQ334762	A/chicken/Thailand/Kanchanaburi/CK-160/2005
DQ334770	A/quail/Thailand/NakhonPathom/QA-161/2005
DQ360836	A/Thailand/676/2005
DQ372593	A/Thailand/NK165/2005
DQ885620	A/Thailand/NA60/2005
DQ989963	A/open-billedstork/Nakhonsawan/BBD0104F/2004
DQ989971	A/open-billedstork/Nakhonsawan/BBD0404F/2004
DQ989981	A/open-billedstork/Suphanburi/TSD0912F/2004
DQ989989	A/open-billedstork/Nakhonsawan/BBD1521J/2005
DQ989997	A/open-billedstork/Nakhonsawan/BBD2616F/2005
DQ990005	A/open-billedstork/Nakhonsawan/BBA3011M/2005
EF112317	A/open-billedstork/Bangkok/LBD0111F/2004
EF112318	A/open-billedstork/Bangkok/LBD0511F/2004
EF112319	A/open-billedstork/Nakhonsawan/BBD1221J/2005
EF112320	A/open-billedstork/Nakhonsawan/BBD1421J/2005
EF112321	A/open-billedstork/Nakhonsawan/BBD1621J/2005
EF112322	A/open-billedstork/Nakhonsawan/BBD1721J/2005
EF112323	A/open-billedstork/Nakhonsawan/BBD1821J/2005
EF112324	A/open-billedstork/Nakhonsawan/BBD2316F/2005
EF112325	A/open-billedstork/Nakhonsawan/BBD2316F/2005
EF112326	A/open-billedstork/Nakhonsawan/BBD2416F/2005
EF112327	A/open-billedstork/Nakhonsawan/BBD3009M/2005
EF112328	A/open-billedstork/Nakhonsawan/BBD3209M/2005
EF112329	A/open-billedstork/Nakhonsawan/BBD3309M/2005
EF112330	A/open-billedstork/Nakhonsawan/BBD3509M/2005
EF112331	A/open-billedstork/Nakhonsawan/BBA2111M/2005
EF112332	A/open-billedstork/Nakhonsawan/BBA2611M/2005
EF112333	A/open-billedstork/Nakhonsawan/BBA2711M/2005
EF112334	A/open-billedstork/Nakhonsawan/BBA2811M/2005
EF112335	A/open-billedstork/Nakhonsawan/BBA2911M/2005
EF112336	A/open-billedstork/Nakhonsawan/BBA2911M/2005
EF112337	A/open-billedstork/Nakhonsawan/BBA2911M/2005
EF112339	A/open-billedstork/Nakhonsawan/BBD4011M/2005
EF112340	A/open-billedstork/Nakhonsawan/BBD4211M/2005
EF112341	A/open-billedstork/Nakhonsawan/BBD4411M/2005
EF112342	A/open-billedstork/Nakhonsawan/BBD3516M/2005
EF112343	A/open-billedstork/Nakhonsawan/BBD3616M/2005
EF112344	A/open-billedstork/Nakhonsawan/BBA0627May/2005
EF178519	A/goldenpheasant/Thailand/VSMU-21-SPB/2005
EF178530	A/tiger/Thailand/VSMU-11-SPB/2004
EF178533	A/tiger/Thailand/VSMU-23-CBI/2004
EF473071	A/goose/Cambodia/28/2004/2004-01-16
EF512562	A/Prachinburi/6231/2004
EF541470	A/Thailand/16/2004
EF541471	A/Thailand/Kan353/2004
EF541472	A/Thailand/SP83/2004
EF541473	A/Thailand/Chaiyaphum/622/2004
EF593104	A/chicken/Thailand/vsmu-3-BKK/2004
EU233418	A/chicken/Thailand/ICRC-V143/2007
EU268221	A/Thailand/16/2004
EU616826	A/moorhen/Thailand/CU-317/2006
EU616832	A/quail/Thailand/CU-320/2006
EU620661	A/chicken/Thailand/PC-340/2008
EU669188	A/chicken/Thailand/ICRC-195/2007
EU669199	A/chicken/Thailand/ICRC-V586/2008
EU676311	A/duck/Thailand/ICRC-V629/2008
EU676319	A/Kalijpheasant/Thailand/vsmu-1/2008
EU676327	A/brown-headgull/Thailand/vsmu-4/2008
EU875388	A/chicken/Thailand/ICRC-618/2008
FJ750814	A/chicken/Uthaithani/NIAH115067/2008
FJ750821	A/chicken/Sukhothai/NIAH114843/2008
FJ868016	A/chicken/Thailand/ST-351/2008
FJ868027	A/chicken/Sukhothai/NIAH114843/2008
FJ868035	A/chicken/Uthaithani/NIAH115067/2008
GQ466177	A/Thailand/NBL1/2006
GU052435	A/pigeon/Thailand/1B/2004
GU186642	A/unknown/Prachinburi(Thailand)/6231/2004
GU186650	A/duck/AngThong/71(2)/2004
HM590791	A/chicken/Thailand/ICRC-7356/2010
HM590799	A/chicken/Thailand/ICRC-7372/2010
HM627915	A/openbillstork/Thailand/VSMU-4-NSN/2004
HM627923	A/openbillstork/Thailand/VSMU-5-NSN/2004
HM627931	A/openbillstork/Thailand/VSMU-6-BKK/2004
HM627939	A/openbillstork/Thailand/VSMU-8-BKK/2004
HM627947	A/openbillstork/Thailand/VSMU-12-BKK/2003
HQ025951	A/SilverPheasant/Thailand/VSMU-1-CBI/2005
JN634876	A/chicken/Thailand/KU14/2004
JQ794448	A/duck/Thailand/TS01/2006
JQ794456	A/chicken/Thailand/TS02/2006
JQ794465	A/chicken/Thailand/TS03/2006
JQ794472	A/duck/Thailand/TS04/2006
JQ794480	A/pigeon/Thailand/TS01/2007
KJ907472	A/Thailand/NBL1/2006
KJ907480	A/Thailand/NBL1/2006
MG668909	A/Thailand/NBL1/2006
MG668917	A/Thailand/NBL1/2006
MG668925	A/Thailand/NBL1/2006
MG668933	A/Thailand/NBL1/2006
AF144304	A/Goose/Guangdong/1/96/1996
AY651449	A/chicken/Viet_Nam/33/2004/2004-01-01
AY676041	A/duck/Hong_Kong/821/2002/2002-01-01
CY029309	A/duck/Hunan/1386/2003/2003-01-01
CY029372	A/duck/Yunnan/662/2003/2003-01-01
CY029939	A/chicken/Vietnam/15/2004/2004-01-01
CY034208	A/chicken/Vietnam/890/2004/2004-01-01
DQ094276	A/chicken/Viet_Nam/TN-025/2004/2004-01-01
DQ250158	A/chicken/Hong_Kong/3123.1/2002/2002-01-01
DQ321069	A/chicken/Vietnam/27/2003/2003-01-01
DQ493026	A/mallard/Vietnam/352/2005/2005-01-01
DQ493037	A/duck/Vietnam/N-TB/2005/2005-01-01
DQ493039	A/mallard/Vietnam/3/2003/2003-01-01
DQ493045	A/chicken/Vietnam/149/2004/2004-01-01
DQ493061	A/chicken/Vietnam/393/2005/2005-01-01
DQ493069	A/Vietnam/CL02/2005/2005-01-01
EF456793	A/Cambodia/JP52a/2005/2005-01-01
EF473078	A/chicken/Cambodia/022LC3b/2005/2005-01-01
EF541476	A/chicken/Laos/7191/2004/2004-01-01
HM114451	A/Vietnam/UT3028/2003/2003-12-28
HM114499	A/Vietnam/UT3047III/2004/2004-01-20
HQ200429	A/duck/Cambodia/D2KP/2006/2006-04-04
HQ200436	A/duck/Cambodia/D2KC/2006/2006-02-21
HQ200459	A/Cambodia/P0322095/2005/2005-03-22
HQ200520	A/duck/Cambodia/D3KP/2006/2006-03-24
HQ200555	A/chicken/Cambodia/047LC3b/2005/2005-03-24
HQ200591	A/chicken/Cambodia/047LC3/2005/2005-01-01
HQ200592	A/duck/Cambodia/D1KP/2006/2006-01-01
HQ200594	A/duck/Cambodia/D1KC/2006/2006-01-01
HQ636436	A/chicken/Cambodia/013LC2b/2005/2005-02-04

## Sheet: Raw data for Fig 6
NA nucleotide sequences of H5N1 viruses analyzed in Figure 6 of the present study
Accession Number	Strain
AF144304	A/Goose/Guangdong/1/96
KM251483	A/duck/Sichuan/NCXN11/2014
KM251484	A/pigeon/Sichuan/NCXN29/2014
KY437809	A/chicken/Anhui/QD1/2014
GU727671.1	A/duck/Eastern_China/108/2008
EPI_ISL_135216	A/Guizhou/1/2013
EPI_ISL_103713	A/chicken/Bangladesh/3012/2011
EPI_ISL_80654	A/chicken/Vietnam/NCVD-035/2008
JQ936705	A/chicken/Yangon/182/2010
CY098725	A/Hunan/1/2009
EPI_ISL_80715	A/duck/Vietnam/NCVD-293/2009
CY098739	A/Guizhou/1/2009
CY098753	A/Hunan/2/2009
CY098800	A/environment/Guizhou/2/2009
AB478034	A/village_chicken/Kyaing_Tong/2433/2007
HM114619	A/Vietnam/HN31432M/2008
EF124243	A/duck/Shantou/13323/2005
EU195402	A/Mallard/Huadong/lk/2005
KP233706	A/duck/Hunan/316/2005
HM172170	A/chicken/Hunan/21/2005
JX534567.1	A/wild_duck/Shandong/628/2011
DQ095669	A/Duck/Fujian/1734/05/2005
HM172174	A/shrike/Tibet/13/2006
HM172165	A/Anhui/2/2005
HM172167	A/chicken/Sichuan/81/2005
HM172168	A/goose/Hubei/65/2005
EU128239	A/Anhui/1/2005
HM172189	A/Anhui/1/2005
CY040928	A/duck/Laos/P0161/2007
CY040976	A/chicken/Laos/P0130/2007
CY098657	A/Guangdong/2/2006
CY040894	A/chicken/Laos/P0001/2007
CY040920	A/duck/Laos/P0117/2007
CY040912	A/duck/Laos/P0127/2007
EF124200	A/chicken/Hong_Kong/282/2006
GU052488	A/chicken/Hong_Kong/D-06-0947/2006
CY041046	A/chicken/Laos/31/2006
HM006753	A/Chicken/Laos/Xaythiani_26/2006
JX420128	A/duck/Soc_Trang/31/2007
CY034690	A/chicken/Laos/P0020/2007
CY034706	A/duck/Laos/P0106/2007
EF124274	A/chicken/Guangxi/683/2006
EF124239	A/chicken/Guiyang/29/2006
CY098586	A/Guangxi/1/2005
HM114539	A/Vietnam/UT30850/2005
GU052504	A/duck/Hai_Phong_/208/2006
EF124251	A/duck/Hunan/5152/2005
EF124222	A/duck/Guangxi/4830/2005
EU931014	A/duck/Vietnam/218/2005
EU930894	A/chicken/Vietnam/202/2005
EU930966	A/Muscovy_duck/Vietnam/211/2005
CY034722	A/chicken/Laos/P0171/2007
CY040936	A/duck/Laos/A0301/2007
EU221251	A/duck/Nong-Khai/Thailand/KU-56/2007
CY040960	A/duck/Laos/A0617/2007
CY040944	A/chicken/Laos/A0464/2007
CY030495	A/goose/Laos/NCVD-39/2007
CY040901	A/pigeon/Laos/P0022/2007
DQ999873	A/chicken/Thailand/NP-172/2006
CY041040	A/duck/Laos/25/2006
CY041044	A/duck/Laos/22/2006
CY029657	A/duck/Vietnam/37/2007
EF124190	A/Japanese_white-eye/Hong_Kong/1038/2006
EF124197	A/house_crow/Hong_Kong/2858/2006
EU195394	A/Mallard/Huadong/S/2005
HM172175	A/duck/Anhui/56/2005
CY036271	A/peregrine_falcon/HongKong/2142/2008
AB521160	A/peregrine_falcon/Hong_Kong/810/2009
EPI_ISL_80619	A/chicken/Vietnam/NCVD-281/2009
HM114595	A/Vietnam/UT31394II/2008
HM172169	A/chicken/Fujian/1/2007
EPI_ISL_80631	A/chicken/Vietnam/NCVD-279/2009
GU050351	A/muscovy_duck/Bac_Ninh/07-69/2007
KR732564	A/duck/Vietnam_SonLa/NCVD-33/2007
JX420232	A/Muscovy_duck/Hai_Duong/46/2007
HM114587	A/Vietnam/HN31388M1/2007
KR732529	A/duck/Vietnam_NamDinh/NCVD-88/2007
GU050501	A/duck/Thai_Ninh/07-86/2007
GU050533	A/muscovy_duck/Thai_Binh/07-90/2007
CY036079	A/Japanese_white-eye/Hong_Kong/737/2007
CY036087	A/white-backed_munia/Hong_Kong/828/2007
EF124336	A/duck/Guangxi/1830/2006
AB478032	A/chicken/Hmawbi/517/2007
EF124331	A/duck/Guangxi/1258/2006
EF124332	A/duck/Guangxi/1436/2006
CY030883	A/duck/Yunnan/4873/2006

## Sheet: Raw data for Fig S1
HA nucleotide sequences of H5Nx viruses analyze in Figure S1 of the present study
Genbank Accession Number or EpiFlu Isolation ID	Strain	H5Nx	Subclade
EPI_ISL_1081370	A/Anhui/2021-00011/2020	H5N6	2.3.4.4h
EPI_ISL_1081369	A/Chongqing/00013/2021	H5N6	2.3.4.4h
EPI_ISL_5234816	A/duck/Laos/NL-2175412/2021	H5N6	2.3.4.4h
MW466048|EPI_ISL_4071515	A/duck/Bangladesh/43127/2020	H5N6	2.3.4.4h
EPI_ISL_337274	A/Guangdong/18SF020/2018	H5N6	2.3.4.4h
EPI_ISL_389022	A/chicken/Nghe_An/01VTC/2018	H5N6	2.3.4.4h
EPI_ISL_336925	A/common_gull/Saratov/1676/2018	H5N6	2.3.4.4h
EPI_ISL_404987	A/chicken/Dong_Nai/25437VTC/2019	H5N6	2.3.4.4g
EPI_ISL_1379443	A/chicken/Vietnam/Raho4-Cd-20-421/2020	H5N6	2.3.4.4g
EPI_ISL_400486	A/Common_pheasant/Hunan/11/2015	H5N6	2.3.4.4g
KU143270|EPI_ISL_205120	A/duck/Wuhan/JXYFB22/2015	H5N6	2.3.4.4g
EPI_ISL_292240	A/Bar-headed_Goose/Qinghai/p23/2016	H5N8	2.3.4.4d
EPI_ISL_354562	A/Chicken/Jiangxi/45093/2016	H5N6	2.3.4.4d
EPI_ISL_256213	A/Hubei/29578/2016	H5N6	2.3.4.4d
KY171730|EPI_ISL_244518	A/chicken/Vietnam/NCVD-15A59/2015	H5N6	2.3.4.4f
KX638407|EPI_ISL_278040	A/peregrine_falcon/HK/4955/2015	H5N6	2.3.4.4e
EPI_ISL_200257	A/duck/Guangdong/03.27_DGQTSJ121-P/2015	H5N6	2.3.4.4e
EPI_ISL_239263	A/duck/Korea/H15/2016	H5N6	2.3.4.4e
EPI_ISL_239351	A/duck/Hyogo/1/2016	H5N6	2.3.4.4e
EPI_ISL_199056	A/duck/Hunan/01.21_YYFQH019-P/2015	H5N6	2.3.4.4a
KP285037|EPI_ISL_182068	A/duck/Jiangxi/10160/2014	H5N6	2.3.4.4a
EPI_ISL_163493	A/Sichuan/26221/2014	H5N6	2.3.4.4a
KP307984|EPI_ISL_173878	A/gyrfalcon/Washington/41088-6/2014	H5N8	2.3.4.4c
EPI_ISL_238031	A/Northern_pintail/Washington/40964/2014	H5N2	2.3.4.4c
EPI_ISL_169424	A/chicken/Miyazaki/7/2014	H5N8	2.3.4.4c
KJ509004|EPI_ISL_171700	A/Baikal_teal/Korea/H68/2014	H5N8	2.3.4.4c
KJ413842|EPI_ISL_157610	A/broiler_duck/Korea/Buan2/2014	H5N8	2.3.4.4c
EPI_ISL_167905	A/Chicken/Netherlands/14015526/2014	H5N8	2.3.4.4c
EPI_ISL_169273	A/turkey/Germany/AR2485-86-L00899/2014	H5N8	2.3.4.4c
EPI_ISL_8377418	A/goose/France/21P013228/2021	H5N1	2.3.4.4b
EPI_ISL_1038924	A/Astrakhan/3212/2020	H5N8	2.3.4.4b
EPI_ISL_8799552	A/England/215201407/2021	H5N1	2.3.4.4b
EPI_ISL_644151	A/goose/Omsk/0114/2020	H5N8	2.3.4.4b
EPI_ISL_614399	A/buzzard/Germany-MV/AI02166/2020	H5N5	2.3.4.4b
EPI_ISL_1123358	A/brent_goose/England/095684/2020	H5N5	2.3.4.4b
MW961460|EPI_ISL_4061485	A/chicken/Nigeria/VRD21-109_21VIR2370-425/2021	H5N1	2.3.4.4b
EPI_ISL_2932682	A/pigeon/Kazakhstan/15-20-B-Talg-5/2020	H5N8	2.3.4.4b
EPI_ISL_1665258	A/mute_swan/Austria/21013162_21VIR1085-5/2021	H5N5	2.3.4.4b
EPI_ISL_683592	A/Eurasian_wigeon/Italy/20VIR7301-206/2020	H5N1	2.3.4.4b
KJ476670|EPI_ISL_162301	A/duck/Zhejiang/6D18/2013	H5N8	2.3.4.4b
KJ413834|EPI_ISL_157609	A/breeder_duck/Korea/Gochang1/2014	H5N8	2.3.4.4b
LC379593|EPI_ISL_308782	A/jungle_crow/Hyogo/2803E011/2018	H5N6	2.3.4.4b
LC369573|EPI_ISL_319652	A/tufted_duck/Shimane/3211TY001/2017	H5N6	2.3.4.4b
EPI_ISL_288362	A/chicken/Greece/39_2017/2017	H5N6	2.3.4.4b
EPI_ISL_295027	A/chicken/Kostroma/1718/2017	H5N2	2.3.4.4b
EPI_ISL_348279	A/duck/Nigeria/17RS737-43/2016	H5N8	2.3.4.4b
EPI_ISL_304404	A/Fujian-Sanyuan/21099/2017	H5N6	2.3.4.4b
MN889505|EPI_ISL_503150	A/duck/Nigeria/SK28T_19VIR8424-2/2019	H5N6	2.3.4.4b
EPI_ISL_291109	A/common_pochard/Germany-BY/AR09-18-L02421/2017	H5N6	2.3.4.4b
EPI_ISL_301782	A/white-tailed_eagle/Denmark/3073-1w/2018	H5N6	2.3.4.4b
EPI_ISL_303520	A/Mallard/Republic_of_Georgia/1/2018	H5N6	2.3.4.4b
KC590650|EPI_ISL_137553	A/chicken/Hong_Kong/AP156/2008	H5N1	2.3.4
GU727669.1	A/duck/Eastern_China/108/2008	H5N1	2.3.4
EPI420386	A/Guizhou/1/2003	H5N1	2.3.4.2
DQ999872	A/chicken/Thailand/NP-172/2006	H5N1	2.3.4
EU221249	A/duck/Nong-Khai/Thailand/KU-56/2007	H5N1	2.3.4
EU919136	A/chicken/Mukdahan/NIAH403901/2007	H5N1	2.3.4
EF419243	A/chicken/Nongkhai/NIAH400802/2007	H5N1	2.3.4
DQ992842.1	A/Japanese-white-eye/Hong_Kong/1038/2006	H5N1	2.3.4
DQ371928.1	A-Anhui/1/2005	H5N1	2.3.4
DQ845348|EPI_ISL_10413	A/duck/Laos/3295/2006	H5N1	2.3.4
EPI284466	A/chicken/Vietnam/NCVD-279/2009	H5N1	2.3.4.3
HM114593.1	A/Vietnam/UT31394II/2008	H5N1	2.3.4.3
CY099968.1	A/chicken/Viet_Nam/TMU015/2008	H5N1	2.3.4.3
HM114585.1	A/Vietnam/HN31388M1/2007	H5N1	2.3.4.3
CY036085.1	A/white-backed_munia/HongKong/828/2007	H5N1	2.3.4.3
CY036077.1	A/Japanese_white-eye/Hong_Kong/737/2007	H5N1	2.3.4.3
GU050499	A/duck/Thai_Ninh/07-86/2007	H5N1	2.3.4.3
GU050531	A/muscovy_duck/Thai_Binh/07-90/2007	H5N1	2.3.4.3
KR732410	A/duck/Vietnam_NamDinh/NCVD-88/2007	H5N1	2.3.4.3
EPI353372	A/chicken/Bangladesh/3012/2011	H5N1	2.3.4.2
JN795924.1	A/chicken/Bangladesh/11rs1984-30/2011	H5N1	2.3.4.2
JQ936703.1	A/chicken/Yangon/182/2010	H5N1	2.3.4.2
AB478026.1	A/village_chicken/Kyaing_Tong/2433/2007	H5N1	2.3.4.2
EPI284454	A/chicken/Vietnam/NCVD-281/2009	H5N1	2.3.4.2
EPI284489	A/chicken/Vietnam/NCVD-035/2008	H5N1	2.3.4.2
CY098798	A/environment/Guizhou/2/2009	H5N1	2.3.4.2
HM114617.1	A/Vietnam/HN31432M/2008	H5N1	2.3.4.2
CY098723.1	A/Hunan/1/2009	H5N1	2.3.4.1
CY098304.1	A/chicken/Lao/LH2/2010	H5N1	2.3.4.1
CY098751.1	A/Hunan/2/2009	H5N1	2.3.4.1
CY098737.1	A/Guizhou/1/2009	H5N1	2.3.4.1
EPI284550	A/duck/Vietnam/NCVD-293/2009	H5N1	2.3.4.1

## Sheet: Indentity analysis for Table S3
H5 HA nucleotide similarity analysis between Thailand clade 2.3.4 and various clades belonged to 2.3.4.1, 2.3.4.2, 2.3.4.3, 2.3.4.4, and 2.3.4.4a-h
Sequence Identity Matrix for HA H5 nucleotide similarity analysis
Input Alignment File: E:\Manuscript_2022\Avian H5N1\PeerJ submission\PeerJ_revised submission\H5Nx-2.3.4subclade-2.3.4.4a-h.fasta
Seq->	2-3-4-4h|EPI_ISL_1081370|A/Anhui/2021-00011/2020|H5N6	2-3-4-4h|EPI_ISL_1081369|A/Chongqing/00013/2021|H5N6	2-3-4-4h|EPI_ISL_5234816|A/duck/Laos/NL-2175412/2021|H5N6	2-3-4-4h|MW466048|EPI_ISL_4071515|A/duck/Bangladesh/43127/2020|H5N6	2-3-4-4h|EPI_ISL_337274|A/Guangdong/18SF020/2018|H5N6	2-3-4-4h|EPI_ISL_389022|A/chicken/Nghe_An/01VTC/2018|H5N6	2-3-4-4h|EPI_ISL_336925|A/common_gull/Saratov/1676/2018|H5N6	2-3-4-4g|EPI_ISL_404987|A/chicken/Dong_Nai/25437VTC/2019|H5N6	2-3-4-4g|EPI_ISL_1379443|A/chicken/Vietnam/Raho4-Cd-20-421/2020|H5N6	2-3-4-4g|EPI_ISL_400486|A/Common_pheasant/Hunan/11/2015|H5N6	2-3-4-4g|KU143270|EPI_ISL_205120|A/duck/Wuhan/JXYFB22/2015|H5N6	2-3-4-4d|EPI_ISL_292240|A/Bar-headed_Goose/Qinghai/p23/2016|H5N8	2-3-4-4d|EPI_ISL_354562|A/Chicken/Jiangxi/45093/2016|H5N6	2-3-4-4d|EPI_ISL_256213|A/Hubei/29578/2016|H5N6	2-3-4-4f|KY171730|EPI_ISL_244518|A/chicken/Vietnam/NCVD-15A59/2015|H5N6	2-3-4-4e|KX638407|EPI_ISL_278040|A/peregrine_falcon/HK/4955/2015|H5N6	2-3-4-4e|EPI_ISL_200257|A/duck/Guangdong/03.27_DGQTSJ121-P/2015|H5N6	2-3-4-4e|EPI_ISL_239263|A/duck/Korea/H15/2016|H5N6	2-3-4-4e|EPI_ISL_239351|A/duck/Hyogo/1/2016|H5N6	2-3-4-4a|EPI_ISL_199056|A/duck/Hunan/01.21_YYFQH019-P/2015|H5N6	2-3-4-4a|KP285037|EPI_ISL_182068|A/duck/Jiangxi/10160/2014|H5N6	2-3-4-4a|EPI_ISL_163493|A/Sichuan/26221/2014|H5N6	2-3-4-4c|KP307984|EPI_ISL_173878|A/gyrfalcon/Washington/41088-6/2014|H5N8	2-3-4-4c|EPI_ISL_238031|A/Northern_pintail/Washington/40964/2014|H5N2	2-3-4-4c|EPI_ISL_169424|A/chicken/Miyazaki/7/2014|H5N8	2-3-4-4c|KJ509004|EPI_ISL_171700|A/Baikal_teal/Korea/H68/2014|H5N8	2-3-4-4c|KJ413842|EPI_ISL_157610|A/broiler_duck/Korea/Buan2/2014|H5N8	2-3-4-4c|EPI_ISL_167905|A/Chicken/Netherlands/14015526/2014|H5N8	2-3-4-4c|EPI_ISL_169273|A/turkey/Germany/AR2485-86-L00899/2014|H5N8	2-3-4-4b|EPI_ISL_8377418|A/goose/France/21P013228/2021|H5N1	2-3-4-4b|EPI_ISL_1038924|A/Astrakhan/3212/2020|H5N8	2-3-4-4b|EPI_ISL_8799552|A/England/215201407/2021|H5N1	2-3-4-4b|EPI_ISL_644151|A/goose/Omsk/0114/2020|H5N8	2-3-4-4b|EPI_ISL_614399|A/buzzard/Germany-MV/AI02166/2020|H5N5	2-3-4-4b|EPI_ISL_1123358|A/brent_goose/England/095684/2020|H5N5	2-3-4-4b|MW961460|EPI_ISL_4061485|A/chicken/Nigeria/VRD21-109_21VIR2370-425/2021|H5N1	2-3-4-4b|EPI_ISL_2932682|A/pigeon/Kazakhstan/15-20-B-Talg-5/2020|H5N8	2-3-4-4b|EPI_ISL_1665258|A/mute_swan/Austria/21013162_21VIR1085-5/2021|H5N5	2-3-4-4b|EPI_ISL_683592|A/Eurasian_wigeon/Italy/20VIR7301-206/2020|H5N1	2-3-4-4b|KJ476670|EPI_ISL_162301|A/duck/Zhejiang/6D18/2013|H5N8	2-3-4-4b|KJ413834|EPI_ISL_157609|A/breeder_duck/Korea/Gochang1/2014|H5N8	2-3-4-4b|LC379593|EPI_ISL_308782|A/jungle_crow/Hyogo/2803E011/2018|H5N6	2-3-4-4b|LC369573|EPI_ISL_319652|A/tufted_duck/Shimane/3211TY001/2017|H5N6	2-3-4-4b|EPI_ISL_288362|A/chicken/Greece/39_2017/2017|H5N6	2-3-4-4b|EPI_ISL_295027|A/chicken/Kostroma/1718/2017|H5N2	2-3-4-4b|EPI_ISL_348279|A/duck/Nigeria/17RS737-43/2016|H5N8	2-3-4-4b|EPI_ISL_304404|A/Fujian-Sanyuan/21099/2017|H5N6	2-3-4-4b|MN889505|EPI_ISL_503150|A/duck/Nigeria/SK28T_19VIR8424-2/2019|H5N6	2-3-4-4b|EPI_ISL_291109|A/common_pochard/Germany-BY/AR09-18-L02421/2017|H5N6
2-3-4-4h|EPI_ISL_1081370|A/Anhui/2021-00011/2020|H5N6	ID	0.991	0.957	0.961	0.972	0.969	0.968	0.903	0.907	0.928	0.932	0.935	0.938	0.938	0.937	0.942	0.938	0.931	0.934	0.904	0.91	0.909	0.914	0.913	0.913	0.917	0.917	0.915	0.915	0.897	0.897	0.898	0.899	0.899	0.899	0.9	0.9	0.899	0.899	0.917	0.92	0.9	0.901	0.903	0.903	0.907	0.905	0.897	0.901
2-3-4-4h|EPI_ISL_1081369|A/Chongqing/00013/2021|H5N6	0.991	ID	0.956	0.961	0.97	0.968	0.967	0.901	0.906	0.927	0.932	0.934	0.937	0.935	0.936	0.941	0.937	0.929	0.932	0.904	0.909	0.909	0.911	0.912	0.911	0.916	0.916	0.913	0.914	0.894	0.895	0.896	0.897	0.897	0.897	0.899	0.899	0.897	0.897	0.917	0.919	0.899	0.9	0.901	0.902	0.906	0.904	0.896	0.9
2-3-4-4h|EPI_ISL_5234816|A/duck/Laos/NL-2175412/2021|H5N6	0.957	0.956	ID	0.97	0.974	0.97	0.97	0.92	0.924	0.94	0.948	0.952	0.956	0.954	0.954	0.958	0.955	0.947	0.948	0.923	0.928	0.927	0.928	0.928	0.928	0.934	0.934	0.929	0.93	0.913	0.916	0.915	0.917	0.919	0.917	0.917	0.917	0.916	0.916	0.937	0.94	0.921	0.923	0.923	0.924	0.928	0.927	0.916	0.921
2-3-4-4h|MW466048|EPI_ISL_4071515|A/duck/Bangladesh/43127/2020|H5N6	0.961	0.961	0.97	ID	0.978	0.974	0.974	0.914	0.918	0.936	0.944	0.951	0.952	0.951	0.949	0.953	0.951	0.943	0.944	0.923	0.927	0.925	0.927	0.927	0.927	0.934	0.934	0.93	0.931	0.909	0.911	0.911	0.913	0.914	0.913	0.913	0.913	0.912	0.912	0.934	0.937	0.917	0.919	0.919	0.92	0.923	0.923	0.913	0.918
2-3-4-4h|EPI_ISL_337274|A/Guangdong/18SF020/2018|H5N6	0.972	0.97	0.974	0.978	ID	0.988	0.988	0.917	0.922	0.938	0.946	0.952	0.955	0.954	0.952	0.956	0.953	0.944	0.946	0.92	0.926	0.924	0.926	0.926	0.926	0.933	0.932	0.928	0.929	0.909	0.91	0.91	0.913	0.914	0.913	0.913	0.913	0.911	0.911	0.933	0.936	0.914	0.916	0.919	0.918	0.922	0.922	0.912	0.916
2-3-4-4h|EPI_ISL_389022|A/chicken/Nghe_An/01VTC/2018|H5N6	0.969	0.968	0.97	0.974	0.988	ID	0.999	0.914	0.919	0.935	0.943	0.951	0.954	0.952	0.951	0.955	0.951	0.943	0.944	0.919	0.924	0.923	0.925	0.926	0.924	0.931	0.93	0.926	0.927	0.908	0.91	0.91	0.912	0.913	0.912	0.912	0.912	0.91	0.911	0.933	0.936	0.915	0.917	0.919	0.92	0.923	0.923	0.912	0.916
2-3-4-4h|EPI_ISL_336925|A/common_gull/Saratov/1676/2018|H5N6	0.968	0.967	0.97	0.974	0.988	0.999	ID	0.914	0.919	0.934	0.943	0.95	0.954	0.952	0.95	0.955	0.951	0.942	0.944	0.919	0.924	0.923	0.924	0.925	0.923	0.93	0.93	0.926	0.927	0.907	0.909	0.909	0.911	0.913	0.911	0.911	0.911	0.909	0.91	0.932	0.935	0.914	0.916	0.919	0.919	0.922	0.922	0.911	0.916
2-3-4-4g|EPI_ISL_404987|A/chicken/Dong_Nai/25437VTC/2019|H5N6	0.903	0.901	0.92	0.914	0.917	0.914	0.914	ID	0.982	0.95	0.958	0.933	0.936	0.936	0.942	0.944	0.941	0.93	0.934	0.924	0.929	0.929	0.928	0.928	0.928	0.931	0.932	0.927	0.926	0.91	0.909	0.909	0.91	0.911	0.911	0.911	0.911	0.91	0.91	0.933	0.937	0.917	0.919	0.918	0.921	0.923	0.921	0.913	0.916
2-3-4-4g|EPI_ISL_1379443|A/chicken/Vietnam/Raho4-Cd-20-421/2020|H5N6	0.907	0.906	0.924	0.918	0.922	0.919	0.919	0.982	ID	0.954	0.961	0.934	0.937	0.937	0.944	0.946	0.943	0.932	0.936	0.924	0.93	0.93	0.928	0.928	0.932	0.934	0.934	0.93	0.93	0.91	0.908	0.908	0.909	0.91	0.91	0.911	0.91	0.91	0.909	0.935	0.937	0.916	0.918	0.919	0.921	0.923	0.921	0.913	0.917
2-3-4-4g|EPI_ISL_400486|A/Common_pheasant/Hunan/11/2015|H5N6	0.928	0.927	0.94	0.936	0.938	0.935	0.934	0.95	0.954	ID	0.986	0.954	0.958	0.957	0.963	0.968	0.965	0.953	0.957	0.938	0.943	0.943	0.943	0.944	0.943	0.949	0.948	0.944	0.943	0.926	0.928	0.926	0.928	0.928	0.928	0.93	0.928	0.927	0.927	0.954	0.955	0.933	0.934	0.934	0.936	0.94	0.939	0.927	0.933
2-3-4-4g|KU143270|EPI_ISL_205120|A/duck/Wuhan/JXYFB22/2015|H5N6	0.932	0.932	0.948	0.944	0.946	0.943	0.943	0.958	0.961	0.986	ID	0.964	0.967	0.965	0.973	0.976	0.974	0.961	0.965	0.946	0.951	0.951	0.954	0.954	0.954	0.96	0.959	0.954	0.954	0.934	0.936	0.936	0.937	0.938	0.938	0.938	0.938	0.937	0.937	0.964	0.965	0.944	0.946	0.944	0.947	0.95	0.949	0.937	0.943
2-3-4-4d|EPI_ISL_292240|A/Bar-headed_Goose/Qinghai/p23/2016|H5N8	0.935	0.934	0.952	0.951	0.952	0.951	0.95	0.933	0.934	0.954	0.964	ID	0.994	0.991	0.969	0.974	0.97	0.96	0.964	0.94	0.944	0.944	0.942	0.943	0.942	0.948	0.947	0.942	0.942	0.923	0.925	0.925	0.926	0.927	0.927	0.927	0.927	0.926	0.926	0.949	0.952	0.932	0.934	0.935	0.936	0.94	0.938	0.927	0.933
2-3-4-4d|EPI_ISL_354562|A/Chicken/Jiangxi/45093/2016|H5N6	0.938	0.937	0.956	0.952	0.955	0.954	0.954	0.936	0.937	0.958	0.967	0.994	ID	0.997	0.973	0.978	0.974	0.963	0.967	0.943	0.948	0.948	0.947	0.947	0.947	0.953	0.952	0.947	0.947	0.927	0.928	0.928	0.93	0.931	0.931	0.931	0.931	0.93	0.93	0.953	0.955	0.936	0.937	0.938	0.939	0.943	0.942	0.93	0.936
2-3-4-4d|EPI_ISL_256213|A/Hubei/29578/2016|H5N6	0.938	0.935	0.954	0.951	0.954	0.952	0.952	0.936	0.937	0.957	0.965	0.991	0.997	ID	0.971	0.976	0.972	0.961	0.965	0.94	0.945	0.945	0.945	0.946	0.945	0.951	0.95	0.946	0.945	0.927	0.928	0.928	0.929	0.93	0.93	0.93	0.93	0.929	0.929	0.952	0.955	0.935	0.937	0.938	0.938	0.943	0.941	0.93	0.936
2-3-4-4f|KY171730|EPI_ISL_244518|A/chicken/Vietnam/NCVD-15A59/2015|H5N6	0.937	0.936	0.954	0.949	0.952	0.951	0.95	0.942	0.944	0.963	0.973	0.969	0.973	0.971	ID	0.982	0.978	0.967	0.971	0.945	0.95	0.95	0.95	0.95	0.951	0.957	0.956	0.951	0.951	0.929	0.931	0.932	0.932	0.933	0.933	0.933	0.933	0.931	0.932	0.961	0.964	0.943	0.944	0.943	0.945	0.95	0.948	0.934	0.941
2-3-4-4e|KX638407|EPI_ISL_278040|A/peregrine_falcon/HK/4955/2015|H5N6	0.942	0.941	0.958	0.953	0.956	0.955	0.955	0.944	0.946	0.968	0.976	0.974	0.978	0.976	0.982	ID	0.987	0.975	0.98	0.947	0.952	0.952	0.954	0.954	0.954	0.961	0.96	0.954	0.954	0.933	0.935	0.935	0.936	0.937	0.937	0.937	0.937	0.936	0.936	0.962	0.964	0.943	0.944	0.944	0.946	0.95	0.95	0.937	0.943
2-3-4-4e|EPI_ISL_200257|A/duck/Guangdong/03.27_DGQTSJ121-P/2015|H5N6	0.938	0.937	0.955	0.951	0.953	0.951	0.951	0.941	0.943	0.965	0.974	0.97	0.974	0.972	0.978	0.987	ID	0.983	0.986	0.945	0.95	0.95	0.951	0.951	0.951	0.958	0.957	0.951	0.951	0.933	0.934	0.933	0.936	0.937	0.938	0.937	0.937	0.936	0.936	0.959	0.962	0.941	0.943	0.943	0.944	0.948	0.947	0.935	0.941
2-3-4-4e|EPI_ISL_239263|A/duck/Korea/H15/2016|H5N6	0.931	0.929	0.947	0.943	0.944	0.943	0.942	0.93	0.932	0.953	0.961	0.96	0.963	0.961	0.967	0.975	0.983	ID	0.992	0.937	0.943	0.943	0.943	0.943	0.941	0.948	0.947	0.941	0.941	0.923	0.926	0.924	0.927	0.927	0.928	0.927	0.927	0.926	0.926	0.948	0.951	0.931	0.933	0.934	0.935	0.938	0.937	0.926	0.931
2-3-4-4e|EPI_ISL_239351|A/duck/Hyogo/1/2016|H5N6	0.934	0.932	0.948	0.944	0.946	0.944	0.944	0.934	0.936	0.957	0.965	0.964	0.967	0.965	0.971	0.98	0.986	0.992	ID	0.939	0.944	0.944	0.946	0.946	0.945	0.952	0.951	0.945	0.945	0.927	0.929	0.928	0.93	0.931	0.931	0.931	0.931	0.93	0.93	0.952	0.955	0.935	0.937	0.937	0.939	0.943	0.941	0.929	0.935
2-3-4-4a|EPI_ISL_199056|A/duck/Hunan/01.21_YYFQH019-P/2015|H5N6	0.904	0.904	0.923	0.923	0.92	0.919	0.919	0.924	0.924	0.938	0.946	0.94	0.943	0.94	0.945	0.947	0.945	0.937	0.939	ID	0.992	0.993	0.94	0.941	0.941	0.947	0.946	0.94	0.94	0.934	0.933	0.933	0.934	0.935	0.935	0.936	0.935	0.933	0.934	0.963	0.963	0.941	0.941	0.944	0.945	0.949	0.948	0.938	0.943
2-3-4-4a|KP285037|EPI_ISL_182068|A/duck/Jiangxi/10160/2014|H5N6	0.91	0.909	0.928	0.927	0.926	0.924	0.924	0.929	0.93	0.943	0.951	0.944	0.948	0.945	0.95	0.952	0.95	0.943	0.944	0.992	ID	0.996	0.945	0.946	0.946	0.952	0.951	0.945	0.945	0.936	0.937	0.937	0.938	0.939	0.939	0.94	0.939	0.937	0.938	0.965	0.967	0.945	0.946	0.948	0.949	0.953	0.952	0.942	0.947
2-3-4-4a|EPI_ISL_163493|A/Sichuan/26221/2014|H5N6	0.909	0.909	0.927	0.925	0.924	0.923	0.923	0.929	0.93	0.943	0.951	0.944	0.948	0.945	0.95	0.952	0.95	0.943	0.944	0.993	0.996	ID	0.945	0.946	0.945	0.951	0.95	0.944	0.944	0.935	0.936	0.936	0.937	0.938	0.938	0.939	0.938	0.936	0.937	0.965	0.966	0.944	0.944	0.947	0.948	0.952	0.951	0.941	0.946
2-3-4-4c|KP307984|EPI_ISL_173878|A/gyrfalcon/Washington/41088-6/2014|H5N8	0.914	0.911	0.928	0.927	0.926	0.925	0.924	0.928	0.928	0.943	0.954	0.942	0.947	0.945	0.95	0.954	0.951	0.943	0.946	0.94	0.945	0.945	ID	0.997	0.982	0.99	0.99	0.983	0.983	0.928	0.928	0.928	0.931	0.931	0.931	0.932	0.932	0.931	0.931	0.954	0.957	0.936	0.937	0.934	0.94	0.94	0.94	0.927	0.934
2-3-4-4c|EPI_ISL_238031|A/Northern_pintail/Washington/40964/2014|H5N2	0.913	0.912	0.928	0.927	0.926	0.926	0.925	0.928	0.928	0.944	0.954	0.943	0.947	0.946	0.95	0.954	0.951	0.943	0.946	0.941	0.946	0.946	0.997	ID	0.982	0.991	0.99	0.984	0.984	0.929	0.93	0.93	0.932	0.932	0.932	0.933	0.933	0.932	0.932	0.955	0.958	0.937	0.938	0.936	0.941	0.941	0.941	0.928	0.936
2-3-4-4c|EPI_ISL_169424|A/chicken/Miyazaki/7/2014|H5N8	0.913	0.911	0.928	0.927	0.926	0.924	0.923	0.928	0.932	0.943	0.954	0.942	0.947	0.945	0.951	0.954	0.951	0.941	0.945	0.941	0.946	0.945	0.982	0.982	ID	0.991	0.99	0.983	0.983	0.928	0.93	0.93	0.932	0.932	0.932	0.932	0.932	0.932	0.931	0.957	0.96	0.937	0.939	0.937	0.941	0.943	0.943	0.93	0.938
2-3-4-4c|KJ509004|EPI_ISL_171700|A/Baikal_teal/Korea/H68/2014|H5N8	0.917	0.916	0.934	0.934	0.933	0.931	0.93	0.931	0.934	0.949	0.96	0.948	0.953	0.951	0.957	0.961	0.958	0.948	0.952	0.947	0.952	0.951	0.99	0.991	0.991	ID	0.998	0.991	0.991	0.934	0.936	0.934	0.938	0.938	0.938	0.938	0.938	0.937	0.937	0.963	0.965	0.943	0.944	0.943	0.946	0.948	0.948	0.936	0.943
2-3-4-4c|KJ413842|EPI_ISL_157610|A/broiler_duck/Korea/Buan2/2014|H5N8	0.917	0.916	0.934	0.934	0.932	0.93	0.93	0.932	0.934	0.948	0.959	0.947	0.952	0.95	0.956	0.96	0.957	0.947	0.951	0.946	0.951	0.95	0.99	0.99	0.99	0.998	ID	0.993	0.993	0.933	0.935	0.934	0.937	0.937	0.937	0.937	0.937	0.936	0.936	0.962	0.965	0.942	0.944	0.942	0.946	0.948	0.948	0.935	0.942
2-3-4-4c|EPI_ISL_167905|A/Chicken/Netherlands/14015526/2014|H5N8	0.915	0.913	0.929	0.93	0.928	0.926	0.926	0.927	0.93	0.944	0.954	0.942	0.947	0.946	0.951	0.954	0.951	0.941	0.945	0.94	0.945	0.944	0.983	0.984	0.983	0.991	0.993	ID	0.996	0.93	0.931	0.93	0.933	0.933	0.933	0.933	0.933	0.932	0.932	0.955	0.958	0.939	0.941	0.938	0.941	0.944	0.944	0.931	0.938
2-3-4-4c|EPI_ISL_169273|A/turkey/Germany/AR2485-86-L00899/2014|H5N8	0.915	0.914	0.93	0.931	0.929	0.927	0.927	0.926	0.93	0.943	0.954	0.942	0.947	0.945	0.951	0.954	0.951	0.941	0.945	0.94	0.945	0.944	0.983	0.984	0.983	0.991	0.993	0.996	ID	0.929	0.931	0.93	0.933	0.933	0.933	0.933	0.933	0.932	0.932	0.955	0.958	0.939	0.941	0.938	0.941	0.944	0.944	0.931	0.938
2-3-4-4b|EPI_ISL_8377418|A/goose/France/21P013228/2021|H5N1	0.897	0.894	0.913	0.909	0.909	0.908	0.907	0.91	0.91	0.926	0.934	0.923	0.927	0.927	0.929	0.933	0.933	0.923	0.927	0.934	0.936	0.935	0.928	0.929	0.928	0.934	0.933	0.93	0.929	ID	0.988	0.99	0.99	0.99	0.991	0.993	0.993	0.993	0.994	0.957	0.96	0.967	0.967	0.971	0.966	0.971	0.97	0.963	0.97
2-3-4-4b|EPI_ISL_1038924|A/Astrakhan/3212/2020|H5N8	0.897	0.895	0.916	0.911	0.91	0.91	0.909	0.909	0.908	0.928	0.936	0.925	0.928	0.928	0.931	0.935	0.934	0.926	0.929	0.933	0.937	0.936	0.928	0.93	0.93	0.936	0.935	0.931	0.931	0.988	ID	0.99	0.994	0.994	0.995	0.991	0.995	0.992	0.994	0.96	0.962	0.971	0.971	0.973	0.97	0.975	0.974	0.967	0.974
2-3-4-4b|EPI_ISL_8799552|A/England/215201407/2021|H5N1	0.898	0.896	0.915	0.911	0.91	0.91	0.909	0.909	0.908	0.926	0.936	0.925	0.928	0.928	0.932	0.935	0.933	0.924	0.928	0.933	0.937	0.936	0.928	0.93	0.93	0.934	0.934	0.93	0.93	0.99	0.99	ID	0.991	0.992	0.992	0.993	0.995	0.994	0.995	0.959	0.962	0.97	0.97	0.971	0.969	0.974	0.973	0.967	0.974
2-3-4-4b|EPI_ISL_644151|A/goose/Omsk/0114/2020|H5N8	0.899	0.897	0.917	0.913	0.913	0.912	0.911	0.91	0.909	0.928	0.937	0.926	0.93	0.929	0.932	0.936	0.936	0.927	0.93	0.934	0.938	0.937	0.931	0.932	0.932	0.938	0.937	0.933	0.933	0.99	0.994	0.991	ID	0.995	0.996	0.992	0.996	0.994	0.995	0.96	0.963	0.972	0.973	0.974	0.971	0.977	0.975	0.968	0.975
2-3-4-4b|EPI_ISL_614399|A/buzzard/Germany-MV/AI02166/2020|H5N5	0.899	0.897	0.919	0.914	0.914	0.913	0.913	0.911	0.91	0.928	0.938	0.927	0.931	0.93	0.933	0.937	0.937	0.927	0.931	0.935	0.939	0.938	0.931	0.932	0.932	0.938	0.937	0.933	0.933	0.99	0.994	0.992	0.995	ID	0.997	0.993	0.997	0.994	0.995	0.961	0.964	0.973	0.973	0.974	0.972	0.977	0.976	0.968	0.975
2-3-4-4b|EPI_ISL_1123358|A/brent_goose/England/095684/2020|H5N5	0.899	0.897	0.917	0.913	0.913	0.912	0.911	0.911	0.91	0.928	0.938	0.927	0.931	0.93	0.933	0.937	0.938	0.928	0.931	0.935	0.939	0.938	0.931	0.932	0.932	0.938	0.937	0.933	0.933	0.991	0.995	0.992	0.996	0.997	ID	0.994	0.997	0.995	0.996	0.961	0.964	0.973	0.974	0.975	0.973	0.978	0.977	0.969	0.976
2-3-4-4b|MW961460|EPI_ISL_4061485|A/chicken/Nigeria/VRD21-109_21VIR2370-425/2021|H5N1	0.9	0.899	0.917	0.913	0.913	0.912	0.911	0.911	0.911	0.93	0.938	0.927	0.931	0.93	0.933	0.937	0.937	0.927	0.931	0.936	0.94	0.939	0.932	0.933	0.932	0.938	0.937	0.933	0.933	0.993	0.991	0.993	0.992	0.993	0.994	ID	0.996	0.996	0.997	0.961	0.963	0.971	0.971	0.973	0.97	0.975	0.974	0.967	0.974
2-3-4-4b|EPI_ISL_2932682|A/pigeon/Kazakhstan/15-20-B-Talg-5/2020|H5N8	0.9	0.899	0.917	0.913	0.913	0.912	0.911	0.911	0.91	0.928	0.938	0.927	0.931	0.93	0.933	0.937	0.937	0.927	0.931	0.935	0.939	0.938	0.932	0.933	0.932	0.938	0.937	0.933	0.933	0.993	0.995	0.995	0.996	0.997	0.997	0.996	ID	0.997	0.998	0.961	0.964	0.973	0.974	0.975	0.973	0.978	0.977	0.969	0.976
2-3-4-4b|EPI_ISL_1665258|A/mute_swan/Austria/21013162_21VIR1085-5/2021|H5N5	0.899	0.897	0.916	0.912	0.911	0.91	0.909	0.91	0.91	0.927	0.937	0.926	0.93	0.929	0.931	0.936	0.936	0.926	0.93	0.933	0.937	0.936	0.931	0.932	0.932	0.937	0.936	0.932	0.932	0.993	0.992	0.994	0.994	0.994	0.995	0.996	0.997	ID	0.998	0.959	0.962	0.971	0.971	0.973	0.97	0.975	0.974	0.967	0.974
2-3-4-4b|EPI_ISL_683592|A/Eurasian_wigeon/Italy/20VIR7301-206/2020|H5N1	0.899	0.897	0.916	0.912	0.911	0.911	0.91	0.91	0.909	0.927	0.937	0.926	0.93	0.929	0.932	0.936	0.936	0.926	0.93	0.934	0.938	0.937	0.931	0.932	0.931	0.937	0.936	0.932	0.932	0.994	0.994	0.995	0.995	0.995	0.996	0.997	0.998	0.998	ID	0.96	0.963	0.972	0.973	0.974	0.971	0.977	0.975	0.968	0.975
2-3-4-4b|KJ476670|EPI_ISL_162301|A/duck/Zhejiang/6D18/2013|H5N8	0.917	0.917	0.937	0.934	0.933	0.933	0.932	0.933	0.935	0.954	0.964	0.949	0.953	0.952	0.961	0.962	0.959	0.948	0.952	0.963	0.965	0.965	0.954	0.955	0.957	0.963	0.962	0.955	0.955	0.957	0.96	0.959	0.96	0.961	0.961	0.961	0.961	0.959	0.96	ID	0.994	0.967	0.968	0.969	0.973	0.975	0.974	0.959	0.967
2-3-4-4b|KJ413834|EPI_ISL_157609|A/breeder_duck/Korea/Gochang1/2014|H5N8	0.92	0.919	0.94	0.937	0.936	0.936	0.935	0.937	0.937	0.955	0.965	0.952	0.955	0.955	0.964	0.964	0.962	0.951	0.955	0.963	0.967	0.966	0.957	0.958	0.96	0.965	0.965	0.958	0.958	0.96	0.962	0.962	0.963	0.964	0.964	0.963	0.964	0.962	0.963	0.994	ID	0.971	0.973	0.973	0.977	0.979	0.978	0.963	0.971
2-3-4-4b|LC379593|EPI_ISL_308782|A/jungle_crow/Hyogo/2803E011/2018|H5N6	0.9	0.899	0.921	0.917	0.914	0.915	0.914	0.917	0.916	0.933	0.944	0.932	0.936	0.935	0.943	0.943	0.941	0.931	0.935	0.941	0.945	0.944	0.936	0.937	0.937	0.943	0.942	0.939	0.939	0.967	0.971	0.97	0.972	0.973	0.973	0.971	0.973	0.971	0.972	0.967	0.971	ID	0.997	0.985	0.982	0.985	0.984	0.975	0.982
2-3-4-4b|LC369573|EPI_ISL_319652|A/tufted_duck/Shimane/3211TY001/2017|H5N6	0.901	0.9	0.923	0.919	0.916	0.917	0.916	0.919	0.918	0.934	0.946	0.934	0.937	0.937	0.944	0.944	0.943	0.933	0.937	0.941	0.946	0.944	0.937	0.938	0.939	0.944	0.944	0.941	0.941	0.967	0.971	0.97	0.973	0.973	0.974	0.971	0.974	0.971	0.973	0.968	0.973	0.997	ID	0.985	0.984	0.987	0.986	0.975	0.983
2-3-4-4b|EPI_ISL_288362|A/chicken/Greece/39_2017/2017|H5N6	0.903	0.901	0.923	0.919	0.919	0.919	0.919	0.918	0.919	0.934	0.944	0.935	0.938	0.938	0.943	0.944	0.943	0.934	0.937	0.944	0.948	0.947	0.934	0.936	0.937	0.943	0.942	0.938	0.938	0.971	0.973	0.971	0.974	0.974	0.975	0.973	0.975	0.973	0.974	0.969	0.973	0.985	0.985	ID	0.982	0.987	0.987	0.978	0.984
2-3-4-4b|EPI_ISL_295027|A/chicken/Kostroma/1718/2017|H5N2	0.903	0.902	0.924	0.92	0.918	0.92	0.919	0.921	0.921	0.936	0.947	0.936	0.939	0.938	0.945	0.946	0.944	0.935	0.939	0.945	0.949	0.948	0.94	0.941	0.941	0.946	0.946	0.941	0.941	0.966	0.97	0.969	0.971	0.972	0.973	0.97	0.973	0.97	0.971	0.973	0.977	0.982	0.984	0.982	ID	0.99	0.988	0.973	0.981
2-3-4-4b|EPI_ISL_348279|A/duck/Nigeria/17RS737-43/2016|H5N8	0.907	0.906	0.928	0.923	0.922	0.923	0.922	0.923	0.923	0.94	0.95	0.94	0.943	0.943	0.95	0.95	0.948	0.938	0.943	0.949	0.953	0.952	0.94	0.941	0.943	0.948	0.948	0.944	0.944	0.971	0.975	0.974	0.977	0.977	0.978	0.975	0.978	0.975	0.977	0.975	0.979	0.985	0.987	0.987	0.99	ID	0.994	0.978	0.986
2-3-4-4b|EPI_ISL_304404|A/Fujian-Sanyuan/21099/2017|H5N6	0.905	0.904	0.927	0.923	0.922	0.923	0.922	0.921	0.921	0.939	0.949	0.938	0.942	0.941	0.948	0.95	0.947	0.937	0.941	0.948	0.952	0.951	0.94	0.941	0.943	0.948	0.948	0.944	0.944	0.97	0.974	0.973	0.975	0.976	0.977	0.974	0.977	0.974	0.975	0.974	0.978	0.984	0.986	0.987	0.988	0.994	ID	0.979	0.985
2-3-4-4b|MN889505|EPI_ISL_503150|A/duck/Nigeria/SK28T_19VIR8424-2/2019|H5N6	0.897	0.896	0.916	0.913	0.912	0.912	0.911	0.913	0.913	0.927	0.937	0.927	0.93	0.93	0.934	0.937	0.935	0.926	0.929	0.938	0.942	0.941	0.927	0.928	0.93	0.936	0.935	0.931	0.931	0.963	0.967	0.967	0.968	0.968	0.969	0.967	0.969	0.967	0.968	0.959	0.963	0.975	0.975	0.978	0.973	0.978	0.979	ID	0.987
2-3-4-4b|EPI_ISL_291109|A/common_pochard/Germany-BY/AR09-18-L02421/2017|H5N6	0.901	0.9	0.921	0.918	0.916	0.916	0.916	0.916	0.917	0.933	0.943	0.933	0.936	0.936	0.941	0.943	0.941	0.931	0.935	0.943	0.947	0.946	0.934	0.936	0.938	0.943	0.942	0.938	0.938	0.97	0.974	0.974	0.975	0.975	0.976	0.974	0.976	0.974	0.975	0.967	0.971	0.982	0.983	0.984	0.981	0.986	0.985	0.987	ID
2-3-4-4b|EPI_ISL_301782|A/white-tailed_eagle/Denmark/3073-1w/2018|H5N6	0.903	0.902	0.923	0.92	0.918	0.918	0.917	0.918	0.919	0.934	0.944	0.934	0.938	0.937	0.943	0.944	0.943	0.933	0.937	0.944	0.948	0.947	0.936	0.937	0.94	0.944	0.944	0.94	0.94	0.971	0.975	0.975	0.977	0.977	0.978	0.975	0.978	0.976	0.977	0.969	0.973	0.984	0.985	0.986	0.982	0.988	0.987	0.988	0.997
2-3-4-4b|EPI_ISL_303520|A/Mallard/Republic_of_Georgia/1/2018|H5N6	0.903	0.901	0.923	0.919	0.917	0.917	0.917	0.918	0.919	0.933	0.943	0.933	0.937	0.936	0.942	0.943	0.941	0.932	0.936	0.943	0.947	0.946	0.935	0.936	0.938	0.943	0.943	0.938	0.938	0.97	0.974	0.974	0.975	0.976	0.977	0.974	0.977	0.975	0.975	0.968	0.972	0.983	0.984	0.985	0.981	0.987	0.985	0.99	0.995
2-3-4|KC590650|EPI_ISL_137553|A/chicken/Hong_Kong/AP156/2008|H5N1	0.892	0.89	0.905	0.903	0.901	0.9	0.9	0.898	0.901	0.91	0.918	0.907	0.909	0.907	0.919	0.915	0.913	0.905	0.907	0.917	0.921	0.919	0.905	0.906	0.909	0.912	0.911	0.908	0.908	0.899	0.901	0.901	0.903	0.902	0.903	0.901	0.902	0.9	0.901	0.928	0.929	0.911	0.912	0.91	0.913	0.915	0.914	0.904	0.909
2-3-4|GU727669.1|A/duck/Eastern_China/108|2008|H5N1	0.914	0.911	0.931	0.929	0.929	0.929	0.928	0.923	0.927	0.94	0.95	0.941	0.945	0.943	0.951	0.951	0.95	0.942	0.944	0.951	0.955	0.954	0.944	0.946	0.946	0.951	0.951	0.944	0.944	0.932	0.934	0.934	0.936	0.937	0.936	0.936	0.936	0.934	0.935	0.964	0.967	0.944	0.946	0.944	0.95	0.95	0.949	0.938	0.945
2-3-4-2|EPI420386|A/Guizhou/1|2013|H5N1	0.896	0.893	0.909	0.907	0.907	0.908	0.907	0.899	0.904	0.913	0.921	0.919	0.92	0.918	0.923	0.926	0.92	0.914	0.916	0.921	0.924	0.924	0.916	0.916	0.917	0.921	0.921	0.917	0.917	0.904	0.907	0.906	0.909	0.909	0.909	0.907	0.909	0.907	0.907	0.931	0.933	0.915	0.917	0.914	0.917	0.919	0.919	0.909	0.914
DQ999872|A/chicken/Thailand/NP-172|2006|H5N1	0.903	0.901	0.917	0.917	0.914	0.915	0.914	0.906	0.91	0.923	0.933	0.924	0.927	0.925	0.931	0.931	0.928	0.92	0.922	0.931	0.934	0.933	0.923	0.924	0.925	0.93	0.93	0.926	0.926	0.915	0.917	0.917	0.92	0.919	0.919	0.918	0.919	0.917	0.918	0.943	0.945	0.926	0.928	0.925	0.928	0.93	0.928	0.917	0.926
EU221249|A/duck/Nong-Khai/Thailand/KU-56|2007|H5N1	0.905	0.901	0.92	0.919	0.917	0.918	0.917	0.91	0.914	0.924	0.934	0.928	0.931	0.929	0.934	0.933	0.931	0.923	0.925	0.936	0.938	0.937	0.926	0.927	0.928	0.933	0.933	0.928	0.928	0.917	0.919	0.919	0.921	0.921	0.921	0.92	0.921	0.919	0.92	0.945	0.948	0.929	0.931	0.929	0.931	0.933	0.931	0.92	0.928
EU919136|A/chicken/Mukdahan/NIAH403901|2007|H5N1	0.905	0.901	0.92	0.919	0.917	0.918	0.917	0.91	0.914	0.924	0.934	0.928	0.931	0.929	0.934	0.934	0.931	0.923	0.925	0.936	0.938	0.937	0.926	0.927	0.928	0.933	0.933	0.928	0.928	0.917	0.919	0.919	0.921	0.921	0.921	0.92	0.921	0.919	0.92	0.945	0.948	0.929	0.931	0.929	0.931	0.933	0.931	0.92	0.928
EF419243|A/chicken/Nongkhai/NIAH400802|2007|H5N1	0.903	0.901	0.919	0.917	0.916	0.916	0.916	0.909	0.911	0.922	0.932	0.924	0.927	0.925	0.931	0.93	0.93	0.921	0.923	0.931	0.934	0.933	0.924	0.926	0.926	0.93	0.93	0.926	0.926	0.916	0.918	0.918	0.92	0.92	0.92	0.918	0.92	0.918	0.919	0.943	0.946	0.927	0.929	0.926	0.929	0.931	0.931	0.919	0.927
2-3-4|DQ992842.1|A/Japanese-white-eye/Hong_Kong/1038|2006|H5N1	0.903	0.899	0.917	0.916	0.913	0.913	0.912	0.906	0.908	0.919	0.929	0.923	0.925	0.923	0.93	0.928	0.927	0.92	0.921	0.93	0.932	0.931	0.923	0.922	0.923	0.928	0.927	0.923	0.923	0.913	0.914	0.915	0.916	0.916	0.916	0.916	0.916	0.914	0.916	0.941	0.943	0.924	0.926	0.923	0.927	0.929	0.928	0.916	0.924
2-3-4|DQ371928.1|A-Anhui/1/2005|H5N1	0.908	0.906	0.923	0.923	0.921	0.921	0.92	0.912	0.916	0.927	0.937	0.931	0.933	0.931	0.937	0.938	0.936	0.928	0.93	0.938	0.94	0.939	0.928	0.93	0.93	0.936	0.935	0.931	0.931	0.92	0.922	0.922	0.924	0.924	0.924	0.923	0.924	0.922	0.923	0.948	0.95	0.93	0.932	0.929	0.933	0.935	0.934	0.924	0.93
2-3-4|DQ845348|EPI_ISL_10413|A/duck/Laos/3295/2006|H5N1	0.909	0.907	0.924	0.924	0.922	0.922	0.921	0.912	0.916	0.928	0.937	0.931	0.933	0.931	0.937	0.937	0.935	0.927	0.928	0.938	0.94	0.939	0.928	0.93	0.93	0.936	0.935	0.93	0.931	0.919	0.921	0.921	0.923	0.923	0.923	0.922	0.923	0.921	0.922	0.948	0.95	0.93	0.932	0.929	0.933	0.935	0.934	0.924	0.93
2-3-4-3|EPI284466|A/chicken/Vietnam/NCVD-279|2009|H5N1	0.898	0.894	0.911	0.91	0.911	0.909	0.908	0.904	0.905	0.913	0.923	0.917	0.92	0.918	0.923	0.923	0.922	0.915	0.916	0.921	0.924	0.923	0.918	0.919	0.918	0.923	0.922	0.918	0.918	0.908	0.909	0.908	0.911	0.911	0.911	0.91	0.911	0.909	0.91	0.933	0.935	0.915	0.917	0.916	0.918	0.92	0.919	0.91	0.916
2-3-4-3|HM114593.1|A/Vietnam/UT31394II|2008|H5N1	0.897	0.895	0.912	0.91	0.908	0.908	0.907	0.905	0.906	0.915	0.924	0.919	0.921	0.92	0.924	0.924	0.923	0.917	0.917	0.926	0.928	0.927	0.921	0.922	0.921	0.926	0.925	0.921	0.921	0.911	0.911	0.912	0.914	0.914	0.914	0.914	0.914	0.913	0.914	0.937	0.938	0.919	0.921	0.918	0.922	0.924	0.924	0.911	0.919
2-3-4-3|CY099968.1|A/chicken/Viet_Nam/TMU015|2008|H5N1	0.899	0.896	0.914	0.913	0.912	0.911	0.91	0.907	0.907	0.916	0.926	0.921	0.924	0.922	0.927	0.928	0.926	0.918	0.92	0.927	0.929	0.928	0.923	0.924	0.923	0.927	0.927	0.923	0.923	0.91	0.912	0.911	0.914	0.914	0.914	0.913	0.914	0.912	0.913	0.937	0.939	0.919	0.921	0.918	0.922	0.924	0.923	0.911	0.919
2-3-4-3|HM114585.1|A/Vietnam/HN31388M1|2007|H5N1	0.902	0.9	0.917	0.916	0.913	0.913	0.913	0.909	0.909	0.919	0.929	0.923	0.926	0.924	0.928	0.93	0.929	0.921	0.923	0.927	0.93	0.928	0.924	0.925	0.924	0.928	0.928	0.924	0.924	0.913	0.915	0.914	0.917	0.918	0.917	0.916	0.917	0.915	0.916	0.939	0.941	0.921	0.923	0.92	0.924	0.926	0.924	0.914	0.921
2-3-4-3|CY036085.1|A/white-backed_munia/HongKong/828|2007|H5N1	0.896	0.894	0.911	0.91	0.908	0.908	0.907	0.904	0.906	0.914	0.924	0.919	0.921	0.92	0.925	0.926	0.924	0.915	0.917	0.925	0.927	0.926	0.919	0.92	0.92	0.923	0.923	0.919	0.919	0.909	0.91	0.911	0.912	0.912	0.912	0.911	0.912	0.91	0.911	0.937	0.938	0.919	0.921	0.918	0.922	0.924	0.923	0.911	0.919
2-3-4-3|CY036077.1|A/Japanese_white-eye/Hong_Kong/737|2007|H5N1	0.889	0.886	0.904	0.903	0.901	0.901	0.9	0.899	0.9	0.907	0.917	0.913	0.914	0.913	0.918	0.918	0.916	0.908	0.91	0.919	0.921	0.92	0.911	0.913	0.913	0.916	0.916	0.912	0.912	0.901	0.903	0.904	0.905	0.905	0.905	0.904	0.905	0.903	0.904	0.93	0.932	0.912	0.914	0.911	0.915	0.917	0.916	0.904	0.911
2-3-4-3|GU050499|A/duck/Thai_Ninh/07-86|2007|H5N1	0.904	0.902	0.919	0.917	0.916	0.916	0.915	0.91	0.911	0.921	0.931	0.925	0.927	0.926	0.931	0.931	0.931	0.923	0.924	0.93	0.933	0.931	0.927	0.928	0.927	0.931	0.931	0.927	0.927	0.915	0.917	0.916	0.919	0.919	0.919	0.918	0.919	0.917	0.918	0.942	0.944	0.924	0.926	0.923	0.927	0.928	0.927	0.916	0.923
2-3-4-3|GU050531|A/muscovy_duck/Thai_Binh/07-90|2007|H5N1	0.903	0.901	0.917	0.916	0.914	0.914	0.914	0.909	0.91	0.92	0.93	0.924	0.926	0.924	0.93	0.93	0.93	0.921	0.923	0.929	0.931	0.93	0.927	0.928	0.927	0.931	0.931	0.927	0.927	0.914	0.916	0.914	0.918	0.918	0.918	0.917	0.918	0.916	0.917	0.941	0.943	0.923	0.924	0.921	0.927	0.927	0.926	0.915	0.922
2-3-4-3|KR732410|A/duck/Vietnam_NamDinh/NCVD-88|2007|H5N1	0.903	0.901	0.919	0.917	0.916	0.916	0.915	0.91	0.911	0.921	0.931	0.925	0.927	0.926	0.931	0.931	0.931	0.923	0.924	0.93	0.933	0.931	0.927	0.928	0.927	0.931	0.931	0.927	0.927	0.915	0.917	0.916	0.919	0.919	0.919	0.918	0.919	0.917	0.918	0.942	0.944	0.924	0.926	0.923	0.927	0.928	0.927	0.916	0.923
2-3-4-2|EPI353372|A/chicken/Bangladesh/3012|2011|H5N1	0.899	0.897	0.91	0.906	0.907	0.906	0.906	0.899	0.902	0.914	0.921	0.917	0.92	0.918	0.922	0.922	0.919	0.91	0.912	0.92	0.923	0.923	0.914	0.915	0.916	0.92	0.919	0.915	0.915	0.907	0.908	0.909	0.91	0.91	0.91	0.911	0.91	0.909	0.91	0.934	0.936	0.917	0.919	0.914	0.919	0.92	0.919	0.906	0.914
2-3-4-2|JN795924.1|A/chicken/Bangladesh/11rs1984-30|2011|H5N1	0.873	0.872	0.884	0.881	0.881	0.88	0.88	0.876	0.878	0.888	0.894	0.891	0.893	0.892	0.896	0.896	0.893	0.883	0.884	0.895	0.899	0.899	0.888	0.889	0.89	0.894	0.894	0.892	0.891	0.883	0.884	0.885	0.886	0.886	0.886	0.887	0.886	0.884	0.886	0.909	0.911	0.895	0.896	0.89	0.894	0.896	0.896	0.882	0.89
2-3-4-2|JQ936703.1|A/chicken/Yangon/182|2010|H5N1	0.906	0.905	0.915	0.913	0.912	0.913	0.912	0.904	0.908	0.919	0.927	0.924	0.926	0.924	0.93	0.929	0.926	0.916	0.918	0.924	0.926	0.927	0.92	0.921	0.921	0.926	0.925	0.921	0.921	0.91	0.911	0.911	0.914	0.914	0.914	0.913	0.914	0.911	0.913	0.937	0.939	0.921	0.923	0.918	0.922	0.924	0.923	0.91	0.919
2-3-4-2|AB478026.1|A/village_chicken/Kyaing_Tong/2433|2007|H5N1	0.908	0.906	0.92	0.92	0.917	0.917	0.917	0.912	0.915	0.925	0.935	0.928	0.93	0.929	0.934	0.933	0.93	0.921	0.923	0.933	0.933	0.933	0.925	0.926	0.927	0.932	0.931	0.928	0.927	0.914	0.915	0.915	0.917	0.917	0.917	0.916	0.917	0.915	0.916	0.943	0.944	0.927	0.929	0.923	0.928	0.929	0.928	0.916	0.924
2-3-4-2|EPI284454|A/chicken/Vietnam/NCVD-281|2009|H5N1	0.906	0.904	0.921	0.919	0.917	0.916	0.916	0.909	0.913	0.923	0.933	0.927	0.928	0.927	0.933	0.933	0.929	0.921	0.923	0.93	0.932	0.932	0.924	0.925	0.926	0.931	0.93	0.925	0.926	0.912	0.914	0.915	0.916	0.916	0.916	0.915	0.916	0.915	0.915	0.941	0.943	0.924	0.926	0.922	0.926	0.928	0.927	0.914	0.923
2-3-4-2|EPI284489|A/chicken/Vietnam/NCVD-035|2008|H5N1	0.906	0.904	0.92	0.919	0.917	0.919	0.918	0.909	0.913	0.923	0.933	0.928	0.93	0.928	0.934	0.933	0.931	0.923	0.924	0.932	0.934	0.934	0.924	0.925	0.926	0.931	0.93	0.926	0.926	0.915	0.916	0.916	0.918	0.918	0.918	0.918	0.918	0.916	0.917	0.944	0.946	0.926	0.927	0.924	0.928	0.93	0.928	0.916	0.924
2-3-4-2|CY098798|A/environment/Guizhou/2|2009|H5N1	0.907	0.906	0.919	0.918	0.916	0.916	0.916	0.907	0.911	0.923	0.931	0.927	0.928	0.927	0.933	0.934	0.929	0.92	0.922	0.931	0.933	0.933	0.923	0.924	0.925	0.93	0.929	0.925	0.925	0.916	0.917	0.917	0.92	0.92	0.92	0.919	0.92	0.917	0.919	0.944	0.944	0.925	0.927	0.923	0.927	0.929	0.928	0.916	0.924
2-3-4-2|HM114617.1|A/Vietnam/HN31432M|2008|H5N1	0.907	0.906	0.922	0.921	0.919	0.918	0.917	0.909	0.913	0.923	0.933	0.929	0.93	0.928	0.934	0.934	0.931	0.922	0.924	0.933	0.934	0.934	0.924	0.926	0.927	0.931	0.931	0.927	0.927	0.914	0.916	0.916	0.918	0.918	0.918	0.917	0.918	0.917	0.917	0.943	0.945	0.926	0.927	0.924	0.928	0.93	0.928	0.916	0.924
2-3-4-1|CY098723.1|A/Hunan/1|2009|H5N1	0.894	0.892	0.91	0.91	0.907	0.907	0.907	0.902	0.905	0.914	0.924	0.921	0.922	0.92	0.923	0.923	0.921	0.913	0.915	0.927	0.93	0.928	0.916	0.917	0.919	0.923	0.922	0.918	0.919	0.911	0.913	0.911	0.915	0.915	0.915	0.914	0.915	0.914	0.914	0.935	0.937	0.92	0.922	0.92	0.923	0.926	0.924	0.916	0.92
2-3-4-1|CY098304.1|A/chicken/Lao/LH2|2010|H5N1	0.896	0.892	0.911	0.913	0.911	0.911	0.91	0.901	0.904	0.915	0.923	0.92	0.921	0.919	0.923	0.923	0.921	0.915	0.916	0.923	0.926	0.924	0.915	0.916	0.917	0.922	0.921	0.917	0.919	0.906	0.907	0.906	0.91	0.91	0.91	0.909	0.91	0.907	0.909	0.934	0.937	0.917	0.919	0.916	0.92	0.922	0.921	0.911	0.917
2-3-4-1|CY098751.1|A/Hunan/2|2009|H5N1	0.896	0.892	0.911	0.911	0.91	0.91	0.909	0.902	0.905	0.915	0.923	0.92	0.921	0.919	0.923	0.923	0.921	0.913	0.915	0.924	0.927	0.926	0.916	0.917	0.918	0.923	0.923	0.919	0.92	0.906	0.908	0.907	0.91	0.91	0.91	0.909	0.91	0.908	0.909	0.935	0.938	0.918	0.92	0.917	0.921	0.923	0.921	0.911	0.917
2-3-4-1|CY098737.1|A/Guizhou/1|2009|H5N1	0.899	0.895	0.914	0.916	0.914	0.914	0.913	0.905	0.908	0.918	0.926	0.923	0.924	0.922	0.926	0.926	0.924	0.916	0.918	0.927	0.93	0.928	0.919	0.92	0.921	0.926	0.926	0.921	0.923	0.909	0.911	0.91	0.913	0.913	0.913	0.912	0.913	0.911	0.912	0.938	0.941	0.921	0.923	0.92	0.924	0.926	0.924	0.914	0.92
2-3-4-1|EPI284550|A/duck/Vietnam/NCVD-293|2009|H5N1	0.897	0.893	0.912	0.914	0.912	0.912	0.911	0.904	0.907	0.916	0.924	0.921	0.922	0.92	0.924	0.924	0.923	0.914	0.916	0.926	0.929	0.928	0.917	0.919	0.919	0.924	0.924	0.92	0.921	0.907	0.909	0.908	0.911	0.911	0.911	0.91	0.911	0.909	0.91	0.936	0.939	0.919	0.921	0.918	0.922	0.924	0.923	0.914	0.919
[truncated: 34 more columns]
