# Supplementary material for: Genetic evolution of hemagglutinin and neuraminidase genes of H5N1 highly pathogenic avian influenza viruses in Thailand
Source: PeerJ. 2022 Nov 30;10:e14419. doi: 10.7717/peerj.14419 (PMC9744161; doi:10.7717/peerj.14419)
Supplement: Supplemental Information 1 [file peerj-10-14419-s001.xlsx]

## Sheet: H5N1 HA Thailand Complete
Table S1. H5N1 HA dataset analyzed in the study
GenBank accession no.	Length	Host	Segment	Serotype	Country	Date of collection	Virus name
DQ076201	1730	Avian	4 (HA)	H5N1	Thailand	2004	Influenza A virus (A/Ck/Thailand/73/2004(H5N1))
EU676317	1735	Avian	4 (HA)	H5N1	Thailand	2008	Influenza A virus (A/Kalij pheasant/Thailand/vsmu-1/2008(H5N1))
DQ083585	1712	Avian	4 (HA)	H5N1	Thailand	2004	Influenza A virus (A/Mynas/Ranong/Thailand/CU-209/04(H5N1))
EF541392	1741	Human	4 (HA)	H5N1	Thailand	2004	Influenza A virus (A/Prachinburi/6231/2004(H5N1))
HQ025949	1708	Avian	4 (HA)	H5N1	Thailand	2005	Influenza A virus (A/Silver Pheasant/Thailand/VSMU-1-CBI/2005(H5N1))
AY555150	1736	Human	4 (HA)	H5N1	Thailand	2004	Influenza A virus (A/Thailand/1(KAN-1)/2004(H5N1))
CY111598	1779	Human	4 (HA)	H5N1	Thailand	2004	Influenza A virus (A/Thailand/1(KAN-1)/2004(H5N1))
EF107522	1736	Human	4 (HA)	H5N1	Thailand	2004	Influenza A virus (A/Thailand/1(KAN-1A)/2004(H5N1))
EF541408	1741	Human	4 (HA)	H5N1	Thailand	2004	Influenza A virus (A/Thailand/16/2004(H5N1))
EU268219	1707	Human	4 (HA)	H5N1	Thailand	2004	Influenza A virus (A/Thailand/16/2004(H5N1))
AY555153	1740	Human	4 (HA)	H5N1	Thailand	2004	Influenza A virus (A/Thailand/2(SP-33)/2004(H5N1))
AY577314	1718	Human	4 (HA)	H5N1	Thailand	2004	Influenza A virus (A/Thailand/3(SP-83)/2004(H5N1))
AY626143	1723	Human	4 (HA)	H5N1	Thailand	2004	Influenza A virus (A/Thailand/4(SP-528)/2004(H5N1))
AY627885	1732	Human	4 (HA)	H5N1	Thailand	2004	Influenza A virus (A/Thailand/5(KK-494)/2004(H5N1))
DQ360835	1725	Human	4 (HA)	H5N1	Thailand	2005	Influenza A virus (A/Thailand/676/2005(H5N1))
EF541417	1741	Human	4 (HA)	H5N1	Thailand	2004	Influenza A virus (A/Thailand/Chaiyaphum/622/2004(H5N1))
EF541411	1741	Human	4 (HA)	H5N1	Thailand	2004	Influenza A virus (A/Thailand/Kan353/2004(H5N1))
AY679514	1704	Human	4 (HA)	H5N1	Thailand	2004	Influenza A virus (A/Thailand/LFPN-2004/2004(H5N1))
KJ907478	1709	Human	4 (HA)	H5N1	Thailand	2006-08-10	Influenza A virus (A/Thailand/NBL1/2006(H5N1))
MG668907	1707	Human	4 (HA)	H5N1	Thailand	2006-08-10	Influenza A virus (A/Thailand/NBL1/2006(H5N1))
MG668915	1707	Human	4 (HA)	H5N1	Thailand	2006-08-10	Influenza A virus (A/Thailand/NBL1/2006(H5N1))
MG668923	1707	Human	4 (HA)	H5N1	Thailand	2006-08-10	Influenza A virus (A/Thailand/NBL1/2006(H5N1))
MG668931	1707	Human	4 (HA)	H5N1	Thailand	2006-08-10	Influenza A virus (A/Thailand/NBL1/2006(H5N1))
GQ466176	1718	Human	4 (HA)	H5N1	Thailand	2006-08-10	Influenza A virus (A/Thailand/NBL1/2006(H5N1))
KJ907470	1709	Human	4 (HA)	H5N1	Thailand	2006-08-10	Influenza A virus (A/Thailand/NBL1/2006(H5N1))
EF541410	1741	Human	4 (HA)	H5N1	Thailand	2004	Influenza A virus (A/Thailand/SP83/2004(H5N1))
AY834279	1779	Tiger	4 (HA)	H5N1	Thailand	2004	Influenza A virus (A/Tiger/Thailand/VSMU-1-SPB/2004(H5N1))
EU676325	1758	Avian	4 (HA)	H5N1	Thailand	2008	Influenza A virus (A/brown-head gull/Thailand/vsmu-4/2008(H5N1))
EF178528	1751	Avian	4 (HA)	H5N1	Thailand	2005	Influenza A virus (A/brown-headed gull/Thailand/VSMU-28-SPK/2005(H5N1))
DQ236077	1712	Cat	4 (HA)	H5N1	Thailand	2004	Influenza A virus (A/cat/Thailand/KU-02/04(H5N1))
EU919140	1716	Avian	4 (HA)	H5N1	Thailand	2007	Influenza A virus (A/chicken/Angthong/NIAH101204/2007(H5N1))
AB450564	1707	Avian	4 (HA)	H5N1	Thailand	2004	Influenza A virus (A/chicken/Angthong/NIAH8334/2004(H5N1))
DQ083551	1712	Avian	4 (HA)	H5N1	Thailand	2004	Influenza A virus (A/chicken/Bangkok/Thailand/CU-3/04(H5N1))
AB450550	1707	Avian	4 (HA)	H5N1	Thailand	2004	Influenza A virus (A/chicken/Kalasin/NIAH316/2004(H5N1))
AB450551	1707	Avian	4 (HA)	H5N1	Thailand	2004	Influenza A virus (A/chicken/Kalasin/NIAH317/2004(H5N1))
AB450567	1707	Avian	4 (HA)	H5N1	Thailand	2005	Influenza A virus (A/chicken/Kalasin/NIAH3776/2005(H5N1))
AB450552	1707	Avian	4 (HA)	H5N1	Thailand	2004	Influenza A virus (A/chicken/Kohn Kaen/NIAH330/2004(H5N1))
AB450557	1707	Avian	4 (HA)	H5N1	Thailand	2004	Influenza A virus (A/chicken/Loei/NIAH2373/2004(H5N1))
EU919136	1729	Avian	4 (HA)	H5N1	Thailand	2007	Influenza A virus (A/chicken/Mukdahan/NIAH403901/2007(H5N1))
AB450559	1707	Avian	4 (HA)	H5N1	Thailand	2004	Influenza A virus (A/chicken/Nakhon Sawan/NIAH01502/2004(H5N1))
AB450560	1707	Avian	4 (HA)	H5N1	Thailand	2004	Influenza A virus (A/chicken/Nakhon Sawan/NIAH01503/2004(H5N1))
EU919139	1707	Avian	4 (HA)	H5N1	Thailand	2008/01	Influenza A virus (A/chicken/Nakhonsawan/NIAH6006587/2008(H5N1))
FJ265569	1730	Avian	4 (HA)	H5N1	Thailand	2005	Influenza A virus (A/chicken/Nakornsawan/NIAH6-3-0009/2005(H5N1))
AB450556	1707	Avian	4 (HA)	H5N1	Thailand	2004	Influenza A virus (A/chicken/NaraThiwat/NIAH1703/2004(H5N1))
EF419243	1729	Avian	4 (HA)	H5N1	Thailand	2007	Influenza A virus (A/chicken/Nongkhai/NIAH400802/2007(H5N1))
AB450555	1707	Avian	4 (HA)	H5N1	Thailand	2004	Influenza A virus (A/chicken/Nonthaburi/NIAH2879/2004(H5N1))
EU919137	1739	Avian	4 (HA)	H5N1	Thailand	2006	Influenza A virus (A/chicken/Phichit/NIAH1/2006(H5N1))
EU919138	1707	Avian	4 (HA)	H5N1	Thailand	2008/01	Influenza A virus (A/chicken/Phichit/NIAH600674/2008(H5N1))
AB450568	1707	Avian	4 (HA)	H5N1	Thailand	2006	Influenza A virus (A/chicken/Phichit/NIAH606988/2006(H5N1))
DQ083578	1717	Avian	4 (HA)	H5N1	Thailand	2004	Influenza A virus (A/chicken/Ratchaburi/Thailand/CU-68/2004(H5N1))
AB450558	1707	Avian	4 (HA)	H5N1	Thailand	2004	Influenza A virus (A/chicken/Samutprakan/NIAH6604/2004(H5N1))
DQ083565	1713	Avian	4 (HA)	H5N1	Thailand	2004	Influenza A virus (A/chicken/Saraburi Thailand/CU-17/2004(H5N1))
FJ455874	1707	Avian	4 (HA)	H5N1	Thailand	2008/11	Influenza A virus (A/chicken/Sukhothai/NIAH114843/2008(H5N1))
FJ868025	1747	Avian	4 (HA)	H5N1	Thailand	2008	Influenza A virus (A/chicken/Sukhothai/NIAH114843/2008(H5N1))
AB440324	1707	Avian	4 (HA)	H5N1	Thailand	2004	Influenza A virus (A/chicken/Suphanburi/1/2004(H5N1))
EF568922	1709	Avian	4 (HA)	H5N1	Thailand	2005	Influenza A virus (A/chicken/Suphanburi/137/2005(H5N1))
AB450565	1707	Avian	4 (HA)	H5N1	Thailand	2005	Influenza A virus (A/chicken/Suphanburi/NIAH108192/2005(H5N1))
AB450561	1707	Avian	4 (HA)	H5N1	Thailand	2004	Influenza A virus (A/chicken/Suphanburi/NIAH7540/2004(H5N1))
AB450562	1707	Avian	4 (HA)	H5N1	Thailand	2004	Influenza A virus (A/chicken/Suphanburi/NIAH7618/2004(H5N1))
AY649382	1708	Avian	4 (HA)	H5N1	Thailand	2004	Influenza A virus (A/chicken/Thailand/CH-2/2004(H5N1))
CY047457	1732	Avian	4 (HA)	H5N1	Thailand	2008-11-14	Influenza A virus (A/chicken/Thailand/CU-354/2008(H5N1))
EU497920	1778	Avian	4 (HA)	H5N1	Thailand	2007	Influenza A virus (A/chicken/Thailand/ICRC-195/2007(H5N1))
EU497921	1736	Avian	4 (HA)	H5N1	Thailand	2007-08-23	Influenza A virus (A/chicken/Thailand/ICRC-213/2007(H5N1))
EU547798	1755	Avian	4 (HA)	H5N1	Thailand	2008	Influenza A virus (A/chicken/Thailand/ICRC-618/2008(H5N1))
HM590789	1719	Avian	4 (HA)	H5N1	Thailand	2010-03-24	Influenza A virus (A/chicken/Thailand/ICRC-7356/2010(H5N1))
HM590797	1720	Avian	4 (HA)	H5N1	Thailand	2010-03-24	Influenza A virus (A/chicken/Thailand/ICRC-7372/2010(H5N1))
EU233416	1745	Avian	4 (HA)	H5N1	Thailand	2007	Influenza A virus (A/chicken/Thailand/ICRC-V143/2007(H5N1))
EU497919	1756	Avian	4 (HA)	H5N1	Thailand	2008	Influenza A virus (A/chicken/Thailand/ICRC-V586/2008(H5N1))
JN634875	1778	Avian	4 (HA)	H5N1	Thailand	2004	Influenza A virus (A/chicken/Thailand/KU14/2004(H5N1))
FJ265573	1730	Avian	4 (HA)	H5N1	Thailand	2005	Influenza A virus (A/chicken/Thailand/Kamphaengphet/NIAH6-3-0006/2005(H5N1))
FJ265574	1744	Avian	4 (HA)	H5N1	Thailand	2005	Influenza A virus (A/chicken/Thailand/Kamphaengphet/NIAH6-3-0008/2005(H5N1))
FJ265575	1744	Avian	4 (HA)	H5N1	Thailand	2005	Influenza A virus (A/chicken/Thailand/Kamphaengphet/NIAH6-3-0009/2005(H5N1))
FJ265576	1740	Avian	4 (HA)	H5N1	Thailand	2005	Influenza A virus (A/chicken/Thailand/Kamphaengphet/NIAH6-3-0010/2005(H5N1))
DQ334760	1761	Avian	4 (HA)	H5N1	Thailand	2005	Influenza A virus (A/chicken/Thailand/Kanchanaburi/CK-160/2005(H5N1))
DQ999872	1717	Avian	4 (HA)	H5N1	Thailand	2006	Influenza A virus (A/chicken/Thailand/NP-172/2006(H5N1))
EU620652	1744	Avian	4 (HA)	H5N1	Thailand	2008	Influenza A virus (A/chicken/Thailand/NS-339/2008(H5N1))
EU850416	1711	Avian	4 (HA)	H5N1	Thailand	2008	Influenza A virus (A/chicken/Thailand/NS-341/2008(H5N1))
DQ334776	1726	Avian	4 (HA)	H5N1	Thailand	2005	Influenza A virus (A/chicken/Thailand/Nontaburi/CK-162/2005(H5N1))
DQ999880	1710	Avian	4 (HA)	H5N1	Thailand	2006	Influenza A virus (A/chicken/Thailand/PC-168/2006(H5N1))
DQ999887	1718	Avian	4 (HA)	H5N1	Thailand	2006	Influenza A virus (A/chicken/Thailand/PC-170/2006(H5N1))
FJ265571	1755	Avian	4 (HA)	H5N1	Thailand	2005	Influenza A virus (A/chicken/Thailand/Phitsanulok/NIAH6-3-0012/2005(H5N1))
FJ868014	1767	Avian	4 (HA)	H5N1	Thailand	2008	Influenza A virus (A/chicken/Thailand/ST-351/2008(H5N1))
FJ265577	1750	Avian	4 (HA)	H5N1	Thailand	2005	Influenza A virus (A/chicken/Thailand/Sukhothai/NIAH6-3-0013/2005(H5N1))
JQ794454	1738	Avian	4 (HA)	H5N1	Thailand	2006	Influenza A virus (A/chicken/Thailand/TS02/2006(H5N1))
JQ794462	1736	Avian	4 (HA)	H5N1	Thailand	2006	Influenza A virus (A/chicken/Thailand/TS03/2006(H5N1))
EF593102	1708	Avian	4 (HA)	H5N1	Thailand	2004	Influenza A virus (A/chicken/Thailand/vsmu-3-BKK/2004(H5N1))
FJ743696	1707	Avian	4 (HA)	H5N1	Thailand	2008/11	Influenza A virus (A/chicken/Uthaithani/NIAH115067/2008(H5N1))
FJ868033	1783	Avian	4 (HA)	H5N1	Thailand	2008	Influenza A virus (A/chicken/Uthaithani/NIAH115067/2008(H5N1))
FJ265572	1748	Avian	4 (HA)	H5N1	Thailand	2005	Influenza A virus (A/chicken/Uthaithani/NIAH6-3-0007/2005(H5N1))
AB450572	1707	Avian	4 (HA)	H5N1	Thailand	2005	Influenza A virus (A/common myna/Thailand/VSMU-10-BRM/2005(H5N1))
DQ083563	1710	Avian	4 (HA)	H5N1	Thailand	2004	Influenza A virus (A/crow/Bangkok/Thailand/CU-15/04(H5N1))
GU186648	1754	Avian	4 (HA)	H5N1	Thailand	2004	Influenza A virus (A/duck/Ang Thong/71(2)/2004(H5N1))
AB440325	1707	Avian	4 (HA)	H5N1	Thailand	2004	Influenza A virus (A/duck/Angthong/72/2004(H5N1))
AB450563	1707	Avian	4 (HA)	H5N1	Thailand	2004	Influenza A virus (A/duck/Angthong/NIAH8246/2004(H5N1))
EU221249	1717	Avian	4 (HA)	H5N1	Thailand	2007	Influenza A virus (A/duck/Nong-Khai/Thailand/KU-56/2007(H5N1))
AB450553	1707	Avian	4 (HA)	H5N1	Thailand	2004	Influenza A virus (A/duck/PhangNga/NIAH181/2004(H5N1))
EU676307	1755	Avian	4 (HA)	H5N1	Thailand	2008	Influenza A virus (A/duck/Thailand/ICRC-V629/2008(H5N1))
JQ794446	1727	Avian	4 (HA)	H5N1	Thailand	2006	Influenza A virus (A/duck/Thailand/TS01/2006(H5N1))
JQ794470	1727	Avian	4 (HA)	H5N1	Thailand	2006	Influenza A virus (A/duck/Thailand/TS04/2006(H5N1))
FJ265570	1758	Avian	4 (HA)	H5N1	Thailand	2005	Influenza A virus (A/duck/Uthaithani/NIAH6-3-0008/2005(H5N1))
HM590781	1719	Environment	4 (HA)	H5N1	Thailand	2010-01-26	Influenza A virus (A/environment/Thailand/ICRC-6670/2010(H5N1))
EF178517	1725	Avian	4 (HA)	H5N1	Thailand	2005	Influenza A virus (A/golden pheasant/Thailand/VSMU-21-SPB/2005(H5N1))
EF206696	1708	Avian	4 (HA)	H5N1	Thailand	2005	Influenza A virus (A/gray-crowed crane/Thailand/VSMU-4-CBI/2005(H5N1))
EF206697	1708	Avian	4 (HA)	H5N1	Thailand	2005	Influenza A virus (A/great barbet/Thailand/VSMU-2-CBI/2005(H5N1))
EF206700	1728	Avian	4 (HA)	H5N1	Thailand	2005	Influenza A virus (A/green peafowl/Thailand/VSMU-3-CBI/2005(H5N1))
AY646175	1712	Leopard	4 (HA)	H5N1	Thailand	2004	Influenza A virus (A/leopard/Suphanburi/Thailand/Leo-1/04(H5N1))
AY553802	1743	Avian	4 (HA)	H5N1	Thailand	2004	Influenza A virus (A/little grebe/Thailand/Phichit-01/2004(H5N1))
AB450577	1707	Avian	4 (HA)	H5N1	Thailand	2005	Influenza A virus (A/open-bill stork/Thailand/VSMU-15-ATG/2005(H5N1))
AB450569	1707	Avian	4 (HA)	H5N1	Thailand	2004	Influenza A virus (A/open-bill stork/Thailand/VSMU-2-NSN/2004(H5N1))
AB450571	1707	Avian	4 (HA)	H5N1	Thailand	2004	Influenza A virus (A/open-bill stork/Thailand/VSMU-20-AYA/2004(H5N1))
AB450579	1707	Avian	4 (HA)	H5N1	Thailand	2005	Influenza A virus (A/open-bill stork/Thailand/VSMU-29-NSN/2005(H5N1))
AB450570	1707	Avian	4 (HA)	H5N1	Thailand	2004	Influenza A virus (A/open-bill stork/Thailand/VSMU-9-BKK/2004(H5N1))
EF206699	1718	Avian	4 (HA)	H5N1	Thailand	2005	Influenza A virus (A/open-billed Stork/Thailand/VSMU-15-ATG/2005(H5N1))
EF112271	1739	Avian	4 (HA)	H5N1	Thailand	2004	Influenza A virus (A/open-billed stork/Bangkok/LBD0111F/04(H5N1))
EF112272	1733	Avian	4 (HA)	H5N1	Thailand	2004	Influenza A virus (A/open-billed stork/Bangkok/LBD0511F/04(H5N1))
EF112292	1736	Avian	4 (HA)	H5N1	Thailand	2005	Influenza A virus (A/open-billed stork/Nakhonsawan/BBA0627May/05(H5N1))
EF112284	1753	Avian	4 (HA)	H5N1	Thailand	2005	Influenza A virus (A/open-billed stork/Nakhonsawan/BBA2611M/05(H5N1))
EF112285	1736	Avian	4 (HA)	H5N1	Thailand	2005	Influenza A virus (A/open-billed stork/Nakhonsawan/BBA2811M/05(H5N1))
EF112286	1756	Avian	4 (HA)	H5N1	Thailand	2005	Influenza A virus (A/open-billed stork/Nakhonsawan/BBA2911M/05(H5N1))
DQ990003	1735	Avian	4 (HA)	H5N1	Thailand	2005	Influenza A virus (A/open-billed stork/Nakhonsawan/BBA3011M/2005(H5N1))
DQ989961	1734	Avian	4 (HA)	H5N1	Thailand	2004	Influenza A virus (A/open-billed stork/Nakhonsawan/BBD0104F/2004(H5N1))
DQ989969	1734	Avian	4 (HA)	H5N1	Thailand	2004	Influenza A virus (A/open-billed stork/Nakhonsawan/BBD0404F/2004(H5N1))
EF112273	1765	Avian	4 (HA)	H5N1	Thailand	2005	Influenza A virus (A/open-billed stork/Nakhonsawan/BBD1221J/05(H5N1))
EF112274	1766	Avian	4 (HA)	H5N1	Thailand	2005	Influenza A virus (A/open-billed stork/Nakhonsawan/BBD1421J/05(H5N1))
DQ989987	1767	Avian	4 (HA)	H5N1	Thailand	2005	Influenza A virus (A/open-billed stork/Nakhonsawan/BBD1521J/2005(H5N1))
EF112275	1766	Avian	4 (HA)	H5N1	Thailand	2005	Influenza A virus (A/open-billed stork/Nakhonsawan/BBD1621J/05(H5N1))
EF112276	1741	Avian	4 (HA)	H5N1	Thailand	2005	Influenza A virus (A/open-billed stork/Nakhonsawan/BBD1721J/05(H5N1))
EF112277	1741	Avian	4 (HA)	H5N1	Thailand	2005	Influenza A virus (A/open-billed stork/Nakhonsawan/BBD1821J/05(H5N1))
EF112278	1760	Avian	4 (HA)	H5N1	Thailand	2005	Influenza A virus (A/open-billed stork/Nakhonsawan/BBD2316F/05(H5N1))
EF112279	1707	Avian	4 (HA)	H5N1	Thailand	2005	Influenza A virus (A/open-billed stork/Nakhonsawan/BBD2416F/05(H5N1))
DQ989995	1744	Avian	4 (HA)	H5N1	Thailand	2005	Influenza A virus (A/open-billed stork/Nakhonsawan/BBD2616F/2005(H5N1))
EF112280	1765	Avian	4 (HA)	H5N1	Thailand	2005	Influenza A virus (A/open-billed stork/Nakhonsawan/BBD3009M/05(H5N1))
EF112281	1765	Avian	4 (HA)	H5N1	Thailand	2005	Influenza A virus (A/open-billed stork/Nakhonsawan/BBD3209M/05(H5N1))
EF112282	1767	Avian	4 (HA)	H5N1	Thailand	2005	Influenza A virus (A/open-billed stork/Nakhonsawan/BBD3309M/05(H5N1))
EF112283	1765	Avian	4 (HA)	H5N1	Thailand	2005	Influenza A virus (A/open-billed stork/Nakhonsawan/BBD3509M/05(H5N1))
EF112290	1734	Avian	4 (HA)	H5N1	Thailand	2005	Influenza A virus (A/open-billed stork/Nakhonsawan/BBD3516M/05(H5N1))
EF112291	1765	Avian	4 (HA)	H5N1	Thailand	2005	Influenza A virus (A/open-billed stork/Nakhonsawan/BBD3616M/05(H5N1))
EF112287	1765	Avian	4 (HA)	H5N1	Thailand	2005	Influenza A virus (A/open-billed stork/Nakhonsawan/BBD4011M/05(H5N1))
EF112288	1765	Avian	4 (HA)	H5N1	Thailand	2005	Influenza A virus (A/open-billed stork/Nakhonsawan/BBD4211M/05(H5N1))
EF112289	1752	Avian	4 (HA)	H5N1	Thailand	2005	Influenza A virus (A/open-billed stork/Nakhonsawan/BBD4411M/05(H5N1))
DQ989979	1734	Avian	4 (HA)	H5N1	Thailand	2004	Influenza A virus (A/open-billed stork/Suphanburi/TSD0912F/2004(H5N1))
HM627945	1781	Avian	4 (HA)	H5N1	Thailand	2003-12-30	Influenza A virus (A/openbill stork/Thailand/VSMU-12-BKK/2003(H5N1))
HM627913	1708	Avian	4 (HA)	H5N1	Thailand	2004-02-05	Influenza A virus (A/openbill stork/Thailand/VSMU-4-NSN/2004(H5N1))
HM627921	1711	Avian	4 (HA)	H5N1	Thailand	2004-02-05	Influenza A virus (A/openbill stork/Thailand/VSMU-5-NSN/2004(H5N1))
HM627929	1729	Avian	4 (HA)	H5N1	Thailand	2004-02-13	Influenza A virus (A/openbill stork/Thailand/VSMU-6-BKK/2004(H5N1))
HM627937	1735	Avian	4 (HA)	H5N1	Thailand	2004-02-12	Influenza A virus (A/openbill stork/Thailand/VSMU-8-BKK/2004(H5N1))
DQ083583	1712	Avian	4 (HA)	H5N1	Thailand	2004	Influenza A virus (A/pigeon/Samut Prakan/Thailand/CU-202/04(H5N1))
GU052433	1754	Avian	4 (HA)	H5N1	Thailand	2004	Influenza A virus (A/pigeon/Thailand/1B/2004(H5N1))
DQ236085	1710	Avian	4 (HA)	H5N1	Thailand	2004	Influenza A virus (A/pigeon/Thailand/KU-03/04(H5N1))
JQ794478	1725	Avian	4 (HA)	H5N1	Thailand	2007	Influenza A virus (A/pigeon/Thailand/TS01/2007(H5N1))
FJ265566	1765	Avian	4 (HA)	H5N1	Thailand	2004	Influenza A virus (A/pigeon/Thailand/Uttaradit-01/2004(H5N1))
AB450573	1707	Avian	4 (HA)	H5N1	Thailand	2005	Influenza A virus (A/pigeon/Thailand/VSMU-11-KRI/2005(H5N1))
AB450574	1707	Avian	4 (HA)	H5N1	Thailand	2005	Influenza A virus (A/pigeon/Thailand/VSMU-13-KRI/2005(H5N1))
EF206698	1712	Avian	4 (HA)	H5N1	Thailand	2005	Influenza A virus (A/pigeon/Thailand/VSMU-25-BKK/2005(H5N1))
AB576202	1707	Avian	4 (HA)	H5N1	Thailand	2004	Influenza A virus (A/pigeon/Thailand/VSMU-7-NPT/2004(H5N1))
AB440326	1707	Avian	4 (HA)	H5N1	Thailand	2004	Influenza A virus (A/quail/Angthong/71/2004(H5N1))
AB450566	1707	Avian	4 (HA)	H5N1	Thailand	2005	Influenza A virus (A/quail/Nakhon Pathom/NIAH7562/2005(H5N1))
AB450554	1707	Avian	4 (HA)	H5N1	Thailand	2004	Influenza A virus (A/quail/Phathumthani/NIAH2711/2004(H5N1))
EU616851	1715	Avian	4 (HA)	H5N1	Thailand	2006	Influenza A virus (A/quail/Thailand/CU-330/06(H5N1))
EU616859	1710	Avian	4 (HA)	H5N1	Thailand	2006	Influenza A virus (A/quail/Thailand/CU-331/06(H5N1))
EU616867	1714	Avian	4 (HA)	H5N1	Thailand	2006	Influenza A virus (A/quail/Thailand/CU-332/06(H5N1))
DQ334768	1726	Avian	4 (HA)	H5N1	Thailand	2005	Influenza A virus (A/quail/Thailand/Nakhon Pathom/QA-161/2005(H5N1))
FJ265565	1765	Avian	4 (HA)	H5N1	Thailand	2004	Influenza A virus (A/quail/Thailand/Phichit-01/2004(H5N1))
DQ083584	1714	Avian	4 (HA)	H5N1	Thailand	2004	Influenza A virus (A/sparrow/Phang-Nga/Thailand/CU-203/04(H5N1))
FJ265567	1742	Avian	4 (HA)	H5N1	Thailand	2004	Influenza A virus (A/sparrow/Thailand/Phitsanulok-01/2004(H5N1))
AY646167	1712	Tiger	4 (HA)	H5N1	Thailand	2004	Influenza A virus (A/tiger/Suphanburi/Thailand/Ti-1/04(H5N1))
AY972539	1718	Tiger	4 (HA)	H5N1	Thailand	2004	Influenza A virus (A/tiger/Thailand/CU-T4/04(H5N1))
AY972541	1726	Tiger	4 (HA)	H5N1	Thailand	2004	Influenza A virus (A/tiger/Thailand/CU-T6/04(H5N1))
AY866475	1762	Tiger	4 (HA)	H5N1	Thailand	2004	Influenza A virus (A/tiger/Thailand/CU-T7/2004(H5N1))
EF178531	1710	Tiger	4 (HA)	H5N1	Thailand	2004	Influenza A virus (A/tiger/Thailand/VSMU-11-SPB/2004(H5N1))
EF178532	1721	Tiger	4 (HA)	H5N1	Thailand	2004	Influenza A virus (A/tiger/Thailand/VSMU-23-CBI/2004(H5N1))
AB450578	1707	Avian	4 (HA)	H5N1	Thailand	2005	Influenza A virus (A/tree sparrow/Ratchaburi/VSMU-16-RBR/2005(H5N1))
AB450575	1707	Avian	4 (HA)	H5N1	Thailand	2005	Influenza A virus (A/tree sparrow/Thailand/VSMU-12-KRI/2005(H5N1))
AB450576	1707	Avian	4 (HA)	H5N1	Thailand	2005	Influenza A virus (A/tree sparrow/Thailand/VSMU-14-KRI/2005(H5N1))
EF178506	1726	Avian	4 (HA)	H5N1	Thailand	2005	Influenza A virus (A/tree sparrow/Thailand/VSMU-16-RBR/2005(H5N1))
GU186640	1754		4 (HA)	H5N1	Thailand	2004	Influenza A virus (A/unknown/Prachinburi (Thailand)/6231/2004(H5N1))
DQ083564	1712	Avian	4 (HA)	H5N1	Thailand	2004	Influenza A virus (A/white peafowl/Bangkok/Thailand/CU-16/04(H5N1))
DQ083573	1719	Avian	4 (HA)	H5N1	Thailand	2004	Influenza A virus (A/white peafowl/Bangkok/Thailand/CU-29/04(H5N1))
