# Supplementary material for: Genetic evolution of hemagglutinin and neuraminidase genes of H5N1 highly pathogenic avian influenza viruses in Thailand
Source: PeerJ. 2022 Nov 30;10:e14419. doi: 10.7717/peerj.14419 (PMC9744161; doi:10.7717/peerj.14419)
Supplement: Supplemental Information 2 [file peerj-10-14419-s002.xlsx]

## Sheet: H5N1 NA Thailand Complete
Table S2. H5N1 NA dataset analyzed in the study
GenBank accession no.	Length	Host	Segment	Serotype	Country	Date of collection	Virus name
AY651439	1350	Avian	6 (NA)	H5N1	Thailand	2004	Influenza A virus (A/Ck/Thailand/1/2004(H5N1))
DQ076202	1357	Avian	6 (NA)	H5N1	Thailand	2004	Influenza A virus (A/Ck/Thailand/73/2004(H5N1))
AY651438	1350	Avian	6 (NA)	H5N1	Thailand	2004	Influenza A virus (A/Ck/Thailand/73/2004(H5N1))
AY651440	1350	Avian	6 (NA)	H5N1	Thailand	2004	Influenza A virus (A/Ck/Thailand/9.1/2004(H5N1))
AY651444	1350	Avian	6 (NA)	H5N1	Thailand	2004	Influenza A virus (A/Gs/Thailand/79/2004(H5N1))
EU676319	1381	Avian	6 (NA)	H5N1	Thailand	2008	Influenza A virus (A/Kalij pheasant/Thailand/vsmu-1/2008(H5N1))
EF512562	1350	Human	6 (NA)	H5N1	Thailand	2004	Influenza A virus (A/Prachinburi/6231/2004(H5N1))
AY651442	1350	Avian	6 (NA)	H5N1	Thailand	2004	Influenza A virus (A/Qa/Thailand/57/2004(H5N1))
HQ025951	1414	Avian	6 (NA)	H5N1	Thailand	2005	Influenza A virus (A/Silver Pheasant/Thailand/VSMU-1-CBI/2005(H5N1))
AY555151	1377	Human	6 (NA)	H5N1	Thailand	2004	Influenza A virus (A/Thailand/1(KAN-1)/2004(H5N1))
CY111600	1399	Human	6 (NA)	H5N1	Thailand	2004	Influenza A virus (A/Thailand/1(KAN-1)/2004(H5N1))
EF541470	1390	Human	6 (NA)	H5N1	Thailand	2004	Influenza A virus (A/Thailand/16/2004(H5N1))
EU268221	1350	Human	6 (NA)	H5N1	Thailand	2004	Influenza A virus (A/Thailand/16/2004(H5N1))
AY555152	1370	Human	6 (NA)	H5N1	Thailand	2004	Influenza A virus (A/Thailand/2(SP-33)/2004(H5N1))
AY577315	1398	Human	6 (NA)	H5N1	Thailand	2004	Influenza A virus (A/Thailand/3(SP-83)/2004(H5N1))
AY577316	1379	Human	6 (NA)	H5N1	Thailand	2004	Influenza A virus (A/Thailand/4(SP-528)/2004(H5N1))
AY627886	1377	Human	6 (NA)	H5N1	Thailand	2004	Influenza A virus (A/Thailand/5(KK-494)/2004(H5N1))
DQ360836	1373	Human	6 (NA)	H5N1	Thailand	2005	Influenza A virus (A/Thailand/676/2005(H5N1))
EF541473	1400	Human	6 (NA)	H5N1	Thailand	2004	Influenza A virus (A/Thailand/Chaiyaphum/622/2004(H5N1))
EF541471	1400	Human	6 (NA)	H5N1	Thailand	2004	Influenza A virus (A/Thailand/Kan353/2004(H5N1))
AY679513	1350	Human	6 (NA)	H5N1	Thailand	2004	Influenza A virus (A/Thailand/LFPN-2004/2004(H5N1))
DQ885620	1350	Human	6 (NA)	H5N1	Thailand	2005	Influenza A virus (A/Thailand/NA60/2005(H5N1))
KJ907480	1372	Human	6 (NA)	H5N1	Thailand	2006-08-10	Influenza A virus (A/Thailand/NBL1/2006(H5N1))
MG668909	1350	Human	6 (NA)	H5N1	Thailand	2006-08-10	Influenza A virus (A/Thailand/NBL1/2006(H5N1))
MG668917	1350	Human	6 (NA)	H5N1	Thailand	2006-08-10	Influenza A virus (A/Thailand/NBL1/2006(H5N1))
MG668925	1350	Human	6 (NA)	H5N1	Thailand	2006-08-10	Influenza A virus (A/Thailand/NBL1/2006(H5N1))
MG668933	1350	Human	6 (NA)	H5N1	Thailand	2006-08-10	Influenza A virus (A/Thailand/NBL1/2006(H5N1))
GQ466177	1376	Human	6 (NA)	H5N1	Thailand	2006-08-10	Influenza A virus (A/Thailand/NBL1/2006(H5N1))
KJ907472	1372	Human	6 (NA)	H5N1	Thailand	2006-08-10	Influenza A virus (A/Thailand/NBL1/2006(H5N1))
DQ372593	1372	Human	6 (NA)	H5N1	Thailand	2005	Influenza A virus (A/Thailand/NK165/2005(H5N1))
EF541472	1400	Human	6 (NA)	H5N1	Thailand	2004	Influenza A virus (A/Thailand/SP83/2004(H5N1))
AY834280	1380	Tiger	6 (NA)	H5N1	Thailand	2004	Influenza A virus (A/Tiger/Thailand/VSMU-1-SPB/2004(H5N1))
AY651441	1350	Avian	6 (NA)	H5N1	Thailand	2004	Influenza A virus (A/bird/Thailand/3.1/2004(H5N1))
EU676327	1388	Avian	6 (NA)	H5N1	Thailand	2008	Influenza A virus (A/brown-head gull/Thailand/vsmu-4/2008(H5N1))
DQ236078	1367	Cat	6 (NA)	H5N1	Thailand	2004	Influenza A virus (A/cat/Thailand/KU-02/04(H5N1))
AB450610	1350	Avian	6 (NA)	H5N1	Thailand	2004	Influenza A virus (A/chicken/Angthong/NIAH8334/2004(H5N1))
AB450596	1350	Avian	6 (NA)	H5N1	Thailand	2004	Influenza A virus (A/chicken/Kalasin/NIAH316/2004(H5N1))
AB450597	1350	Avian	6 (NA)	H5N1	Thailand	2004	Influenza A virus (A/chicken/Kalasin/NIAH317/2004(H5N1))
AB450613	1350	Avian	6 (NA)	H5N1	Thailand	2005	Influenza A virus (A/chicken/Kalasin/NIAH3776/2005(H5N1))
AB450598	1350	Avian	6 (NA)	H5N1	Thailand	2004	Influenza A virus (A/chicken/Kohn Kaen/NIAH330/2004(H5N1))
AB450603	1350	Avian	6 (NA)	H5N1	Thailand	2004	Influenza A virus (A/chicken/Loei/NIAH2373/2004(H5N1))
AB450605	1350	Avian	6 (NA)	H5N1	Thailand	2004	Influenza A virus (A/chicken/Nakhon Sawan/NIAH01502/2004(H5N1))
AB450606	1350	Avian	6 (NA)	H5N1	Thailand	2004	Influenza A virus (A/chicken/Nakhon Sawan/NIAH01503/2004(H5N1))
AB450602	1350	Avian	6 (NA)	H5N1	Thailand	2004	Influenza A virus (A/chicken/NaraThiwat/NIAH1703/2004(H5N1))
AB450601	1350	Avian	6 (NA)	H5N1	Thailand	2004	Influenza A virus (A/chicken/Nonthaburi/NIAH2879/2004(H5N1))
AB450614	1350	Avian	6 (NA)	H5N1	Thailand	2006	Influenza A virus (A/chicken/Phichit/NIAH606988/2006(H5N1))
AB450604	1347	Avian	6 (NA)	H5N1	Thailand	2004	Influenza A virus (A/chicken/Samutprakan/NIAH6604/2004(H5N1))
FJ750821	1350	Avian	6 (NA)	H5N1	Thailand	2008/11	Influenza A virus (A/chicken/Sukhothai/NIAH114843/2008(H5N1))
FJ868027	1395	Avian	6 (NA)	H5N1	Thailand	2008	Influenza A virus (A/chicken/Sukhothai/NIAH114843/2008(H5N1))
AB440327	1350	Avian	6 (NA)	H5N1	Thailand	2004	Influenza A virus (A/chicken/Suphanburi/1/2004(H5N1))
AB450611	1350	Avian	6 (NA)	H5N1	Thailand	2005	Influenza A virus (A/chicken/Suphanburi/NIAH108192/2005(H5N1))
AB450607	1350	Avian	6 (NA)	H5N1	Thailand	2004	Influenza A virus (A/chicken/Suphanburi/NIAH7540/2004(H5N1))
AB450608	1350	Avian	6 (NA)	H5N1	Thailand	2004	Influenza A virus (A/chicken/Suphanburi/NIAH7618/2004(H5N1))
AY649383	1389	Avian	6 (NA)	H5N1	Thailand	2004	Influenza A virus (A/chicken/Thailand/CH-2/2004(H5N1))
CY047453	1363	Avian	6 (NA)	H5N1	Thailand	2008-11-14	Influenza A virus (A/chicken/Thailand/CU-353/2008(H5N1))
EU669188	1374	Avian	6 (NA)	H5N1	Thailand	2007	Influenza A virus (A/chicken/Thailand/ICRC-195/2007(H5N1))
EU875388	1376	Avian	6 (NA)	H5N1	Thailand	2008-01-29	Influenza A virus (A/chicken/Thailand/ICRC-618/2008(H5N1))
HM590791	1366	Avian	6 (NA)	H5N1	Thailand	2010-03-24	Influenza A virus (A/chicken/Thailand/ICRC-7356/2010(H5N1))
HM590799	1354	Avian	6 (NA)	H5N1	Thailand	2010-03-24	Influenza A virus (A/chicken/Thailand/ICRC-7372/2010(H5N1))
EU233418	1379	Avian	6 (NA)	H5N1	Thailand	2007	Influenza A virus (A/chicken/Thailand/ICRC-V143/2007(H5N1))
EU669199	1380	Avian	6 (NA)	H5N1	Thailand	2008	Influenza A virus (A/chicken/Thailand/ICRC-V586/2008(H5N1))
JN634876	1402	Avian	6 (NA)	H5N1	Thailand	2004	Influenza A virus (A/chicken/Thailand/KU14/2004(H5N1))
DQ334762	1358	Avian	6 (NA)	H5N1	Thailand	2005	Influenza A virus (A/chicken/Thailand/Kanchanaburi/CK-160/2005(H5N1))
EU620661	1402	Avian	6 (NA)	H5N1	Thailand	2008	Influenza A virus (A/chicken/Thailand/PC-340/2008(H5N1))
FJ868016	1393	Avian	6 (NA)	H5N1	Thailand	2008	Influenza A virus (A/chicken/Thailand/ST-351/2008(H5N1))
JQ794456	1353	Avian	6 (NA)	H5N1	Thailand	2006	Influenza A virus (A/chicken/Thailand/TS02/2006(H5N1))
JQ794465	1356	Avian	6 (NA)	H5N1	Thailand	2006	Influenza A virus (A/chicken/Thailand/TS03/2006(H5N1))
EF593104	1402	Avian	6 (NA)	H5N1	Thailand	2004	Influenza A virus (A/chicken/Thailand/vsmu-3-BKK/2004(H5N1))
FJ750814	1350	Avian	6 (NA)	H5N1	Thailand	2008/11	Influenza A virus (A/chicken/Uthaithani/NIAH115067/2008(H5N1))
FJ868035	1400	Avian	6 (NA)	H5N1	Thailand	2008	Influenza A virus (A/chicken/Uthaithani/NIAH115067/2008(H5N1))
AB450618	1350	Avian	6 (NA)	H5N1	Thailand	2005	Influenza A virus (A/common myna/Thailand/VSMU-10-BRM/2005(H5N1))
GU186650	1374	Avian	6 (NA)	H5N1	Thailand	2004	Influenza A virus (A/duck/Ang Thong/71(2)/2004(H5N1))
AB440328	1350	Avian	6 (NA)	H5N1	Thailand	2004	Influenza A virus (A/duck/Angthong/72/2004(H5N1))
AB450609	1350	Avian	6 (NA)	H5N1	Thailand	2004	Influenza A virus (A/duck/Angthong/NIAH8246/2004(H5N1))
EU221251	1378	Avian	6 (NA)	H5N1	Thailand	2007	Influenza A virus (A/duck/Nong-Khai/Thailand/KU-56/2007(H5N1))
AB450599	1350	Avian	6 (NA)	H5N1	Thailand	2004	Influenza A virus (A/duck/PhangNga/NIAH181/2004(H5N1))
EU676311	1377	Avian	6 (NA)	H5N1	Thailand	2008	Influenza A virus (A/duck/Thailand/ICRC-V629/2008(H5N1))
JQ794448	1366	Avian	6 (NA)	H5N1	Thailand	2006	Influenza A virus (A/duck/Thailand/TS01/2006(H5N1))
JQ794472	1353	Avian	6 (NA)	H5N1	Thailand	2006	Influenza A virus (A/duck/Thailand/TS04/2006(H5N1))
EF178519	1415	Avian	6 (NA)	H5N1	Thailand	2005	Influenza A virus (A/golden pheasant/Thailand/VSMU-21-SPB/2005(H5N1))
AY553832	1400	Avian	6 (NA)	H5N1	Thailand	2004	Influenza A virus (A/little grebe/Thailand/Phichit-01/2004(H5N1))
EU616826	1351	Avian	6 (NA)	H5N1	Thailand	2006	Influenza A virus (A/moorhen/Thailand/CU-317/06(H5N1))
AB450623	1350	Avian	6 (NA)	H5N1	Thailand	2005	Influenza A virus (A/open-bill stork/Thailand/VSMU-15-ATG/2005(H5N1))
AB450615	1350	Avian	6 (NA)	H5N1	Thailand	2004	Influenza A virus (A/open-bill stork/Thailand/VSMU-2-NSN/2004(H5N1))
AB450617	1350	Avian	6 (NA)	H5N1	Thailand	2004	Influenza A virus (A/open-bill stork/Thailand/VSMU-20-AYA/2004(H5N1))
AB450625	1350	Avian	6 (NA)	H5N1	Thailand	2005	Influenza A virus (A/open-bill stork/Thailand/VSMU-29-NSN/2005(H5N1))
AB450616	1350	Avian	6 (NA)	H5N1	Thailand	2004	Influenza A virus (A/open-bill stork/Thailand/VSMU-9-BKK/2004(H5N1))
EF112317	1378	Avian	6 (NA)	H5N1	Thailand	2004	Influenza A virus (A/open-billed stork/Bangkok/LBD0111F/04(H5N1))
EF112318	1368	Avian	6 (NA)	H5N1	Thailand	2004	Influenza A virus (A/open-billed stork/Bangkok/LBD0511F/04(H5N1))
EF112344	1368	Avian	6 (NA)	H5N1	Thailand	2005	Influenza A virus (A/open-billed stork/Nakhonsawan/BBA0627May/05(H5N1))
EF112331	1374	Avian	6 (NA)	H5N1	Thailand	2005	Influenza A virus (A/open-billed stork/Nakhonsawan/BBA2111M/05(H5N1))
EF112332	1396	Avian	6 (NA)	H5N1	Thailand	2005	Influenza A virus (A/open-billed stork/Nakhonsawan/BBA2611M/05(H5N1))
EF112333	1378	Avian	6 (NA)	H5N1	Thailand	2005	Influenza A virus (A/open-billed stork/Nakhonsawan/BBA2711M/05(H5N1))
EF112334	1388	Avian	6 (NA)	H5N1	Thailand	2005	Influenza A virus (A/open-billed stork/Nakhonsawan/BBA2811M/05(H5N1))
EF112335	1396	Avian	6 (NA)	H5N1	Thailand	2005	Influenza A virus (A/open-billed stork/Nakhonsawan/BBA2911M/05(H5N1))
EF112336	1396	Avian	6 (NA)	H5N1	Thailand	2005	Influenza A virus (A/open-billed stork/Nakhonsawan/BBA2911M/05(H5N1))
EF112337	1396	Avian	6 (NA)	H5N1	Thailand	2005	Influenza A virus (A/open-billed stork/Nakhonsawan/BBA2911M/05(H5N1))
DQ990005	1372	Avian	6 (NA)	H5N1	Thailand	2005	Influenza A virus (A/open-billed stork/Nakhonsawan/BBA3011M/2005(H5N1))
DQ989963	1368	Avian	6 (NA)	H5N1	Thailand	2004	Influenza A virus (A/open-billed stork/Nakhonsawan/BBD0104F/2004(H5N1))
DQ989971	1370	Avian	6 (NA)	H5N1	Thailand	2004	Influenza A virus (A/open-billed stork/Nakhonsawan/BBD0404F/2004(H5N1))
EF112319	1379	Avian	6 (NA)	H5N1	Thailand	2005	Influenza A virus (A/open-billed stork/Nakhonsawan/BBD1221J/05(H5N1))
EF112320	1379	Avian	6 (NA)	H5N1	Thailand	2005	Influenza A virus (A/open-billed stork/Nakhonsawan/BBD1421J/05(H5N1))
DQ989989	1379	Avian	6 (NA)	H5N1	Thailand	2005	Influenza A virus (A/open-billed stork/Nakhonsawan/BBD1521J/2005(H5N1))
EF112321	1379	Avian	6 (NA)	H5N1	Thailand	2005	Influenza A virus (A/open-billed stork/Nakhonsawan/BBD1621J/05(H5N1))
EF112322	1368	Avian	6 (NA)	H5N1	Thailand	2005	Influenza A virus (A/open-billed stork/Nakhonsawan/BBD1721J/05(H5N1))
EF112323	1370	Avian	6 (NA)	H5N1	Thailand	2005	Influenza A virus (A/open-billed stork/Nakhonsawan/BBD1821J/05(H5N1))
EF112324	1396	Avian	6 (NA)	H5N1	Thailand	2005	Influenza A virus (A/open-billed stork/Nakhonsawan/BBD2316F/05(H5N1))
EF112325	1395	Avian	6 (NA)	H5N1	Thailand	2005	Influenza A virus (A/open-billed stork/Nakhonsawan/BBD2316F/05(H5N1))
EF112326	1368	Avian	6 (NA)	H5N1	Thailand	2005	Influenza A virus (A/open-billed stork/Nakhonsawan/BBD2416F/05(H5N1))
DQ989997	1370	Avian	6 (NA)	H5N1	Thailand	2005	Influenza A virus (A/open-billed stork/Nakhonsawan/BBD2616F/2005(H5N1))
EF112327	1370	Avian	6 (NA)	H5N1	Thailand	2005	Influenza A virus (A/open-billed stork/Nakhonsawan/BBD3009M/05(H5N1))
EF112328	1382	Avian	6 (NA)	H5N1	Thailand	2005	Influenza A virus (A/open-billed stork/Nakhonsawan/BBD3209M/05(H5N1))
EF112329	1394	Avian	6 (NA)	H5N1	Thailand	2005	Influenza A virus (A/open-billed stork/Nakhonsawan/BBD3309M/05(H5N1))
EF112330	1379	Avian	6 (NA)	H5N1	Thailand	2005	Influenza A virus (A/open-billed stork/Nakhonsawan/BBD3509M/05(H5N1))
EF112342	1371	Avian	6 (NA)	H5N1	Thailand	2005	Influenza A virus (A/open-billed stork/Nakhonsawan/BBD3516M/05(H5N1))
EF112343	1381	Avian	6 (NA)	H5N1	Thailand	2005	Influenza A virus (A/open-billed stork/Nakhonsawan/BBD3616M/05(H5N1))
EF112339	1382	Avian	6 (NA)	H5N1	Thailand	2005	Influenza A virus (A/open-billed stork/Nakhonsawan/BBD4011M/05(H5N1))
EF112340	1380	Avian	6 (NA)	H5N1	Thailand	2005	Influenza A virus (A/open-billed stork/Nakhonsawan/BBD4211M/05(H5N1))
EF112341	1368	Avian	6 (NA)	H5N1	Thailand	2005	Influenza A virus (A/open-billed stork/Nakhonsawan/BBD4411M/05(H5N1))
DQ989981	1380	Avian	6 (NA)	H5N1	Thailand	2004	Influenza A virus (A/open-billed stork/Suphanburi/TSD0912F/2004(H5N1))
HM627947	1395	Avian	6 (NA)	H5N1	Thailand	2003-12-30	Influenza A virus (A/openbill stork/Thailand/VSMU-12-BKK/2003(H5N1))
HM627915	1415	Avian	6 (NA)	H5N1	Thailand	2004-02-05	Influenza A virus (A/openbill stork/Thailand/VSMU-4-NSN/2004(H5N1))
HM627923	1401	Avian	6 (NA)	H5N1	Thailand	2004-02-05	Influenza A virus (A/openbill stork/Thailand/VSMU-5-NSN/2004(H5N1))
HM627931	1412	Avian	6 (NA)	H5N1	Thailand	2004-02-13	Influenza A virus (A/openbill stork/Thailand/VSMU-6-BKK/2004(H5N1))
HM627939	1398	Avian	6 (NA)	H5N1	Thailand	2004-02-12	Influenza A virus (A/openbill stork/Thailand/VSMU-8-BKK/2004(H5N1))
GU052435	1374	Avian	6 (NA)	H5N1	Thailand	2004	Influenza A virus (A/pigeon/Thailand/1B/2004(H5N1))
DQ236086	1352	Avian	6 (NA)	H5N1	Thailand	2004	Influenza A virus (A/pigeon/Thailand/KU-03/04(H5N1))
JQ794480	1357	Avian	6 (NA)	H5N1	Thailand	2007	Influenza A virus (A/pigeon/Thailand/TS01/2007(H5N1))
AB450619	1350	Avian	6 (NA)	H5N1	Thailand	2005	Influenza A virus (A/pigeon/Thailand/VSMU-11-KRI/2005(H5N1))
AB450620	1350	Avian	6 (NA)	H5N1	Thailand	2005	Influenza A virus (A/pigeon/Thailand/VSMU-13-KRI/2005(H5N1))
AB576204	1350	Avian	6 (NA)	H5N1	Thailand	2004	Influenza A virus (A/pigeon/Thailand/VSMU-7-NPT/2004(H5N1))
AB440329	1350	Avian	6 (NA)	H5N1	Thailand	2004	Influenza A virus (A/quail/Angthong/71/2004(H5N1))
AB450612	1350	Avian	6 (NA)	H5N1	Thailand	2005	Influenza A virus (A/quail/Nakhon Pathom/NIAH7562/2005(H5N1))
AB450600	1350	Avian	6 (NA)	H5N1	Thailand	2004	Influenza A virus (A/quail/Phathumthani/NIAH2711/2004(H5N1))
EU616832	1351	Avian	6 (NA)	H5N1	Thailand	2006	Influenza A virus (A/quail/Thailand/CU-320/06(H5N1))
DQ334770	1352	Avian	6 (NA)	H5N1	Thailand	2005	Influenza A virus (A/quail/Thailand/Nakhon Pathom/QA-161/2005(H5N1))
EF178530	1402	Tiger	6 (NA)	H5N1	Thailand	2004	Influenza A virus (A/tiger/Thailand/VSMU-11-SPB/2004(H5N1))
EF178533	1371	Tiger	6 (NA)	H5N1	Thailand	2004	Influenza A virus (A/tiger/Thailand/VSMU-23-CBI/2004(H5N1))
AB450624	1350	Avian	6 (NA)	H5N1	Thailand	2005	Influenza A virus (A/tree sparrow/Ratchaburi/VSMU-16-RBR/2005(H5N1))
AB450621	1350	Avian	6 (NA)	H5N1	Thailand	2005	Influenza A virus (A/tree sparrow/Thailand/VSMU-12-KRI/2005(H5N1))
AB450622	1350	Avian	6 (NA)	H5N1	Thailand	2005	Influenza A virus (A/tree sparrow/Thailand/VSMU-14-KRI/2005(H5N1))
GU186642	1374		6 (NA)	H5N1	Thailand	2004	Influenza A virus (A/unknown/Prachinburi (Thailand)/6231/2004(H5N1))
DQ083600	1372	Avian	6 (NA)	H5N1	Thailand	2004	Influenza A virus (A/white peafowl/Bangkok/Thailand/CU-16/04(H5N1))
